# Supplementary material for: Mortality Associated With Acute Respiratory Infections Among Children at Home
Source: PubMed Central journal article supplement (PMC6325348; doi:10.1093/infdis/jiy517), 2018-08-28
Supplement: jiy517_suppl_supplementary_table_1.pdf [file jiy517_suppl_supplementary_table_1.pdf]

**Supplementary table 1.** Univariable analysis: Risk Factors for community death in under 5 years old children.

|                                                          | <b>Cases<br/>(n=104 )<br/>n/N (%)</b> | <b>Controls<br/>(n=174)<br/>n/N (%)</b> | <b>Odds ratio (95% IC)</b>  | <b>p</b>         |
|----------------------------------------------------------|---------------------------------------|-----------------------------------------|-----------------------------|------------------|
| <b>Socioeconomic</b>                                     |                                       |                                         |                             |                  |
| <u>Precarious home</u>                                   |                                       |                                         |                             |                  |
| Home made of tin or wood and dirt floor                  | 50/104 (48.1)                         | 61/174 (35.1)                           | 1.73 (0.99 - 3.02)          | 0.052            |
| No running water                                         | 21/104 (20.2)                         | 4/174 (2.3)                             | <b>6.41 (2.12 - 19.47)</b>  | <b>0.001</b>     |
| Crowding (more than 3 person per bedroom)                | 54/104 (51.9)                         | 54/174 (31.03)                          | <b>2.17 (1.27 - 3.68)</b>   | <b>0.004</b>     |
| Tabacco smoke inside                                     | 49/104 (47.1)                         | 64/174 (36.8)                           | 1.73 (0.98 - 3.08)          | 0.058            |
| <u>Vulnerable mother</u>                                 |                                       |                                         |                             |                  |
| Adolescent mother (<19 years)                            | 21/104 (20.2)                         | 7/174 (4.02)                            | <b>5.04 (2.13 - 11.95)</b>  | <b>&lt;0.001</b> |
| Incomplete primary maternal education                    | 83/104 (79.8)                         | 130/174 (74.7)                          | 1.72 (0.90 - 3.31)          | 0.101            |
| Single mother                                            | 21/104 (20.2)                         | 23/174 (13.2)                           | 1.60 (0.78 - 3.27)          | 0.195            |
| Does not receive state aid                               | 37/104 (35.4)                         | 38/174 (21.8)                           | <b>2.40 (1.33 - 4.32)</b>   | <b>0.003</b>     |
| <u>Previous interactions with the health care system</u> |                                       |                                         |                             |                  |
| Incomplete vaccinations for age                          | 22/104 (21.1)                         | 18/174 (10.3)                           | <b>2.47 (1.23 - 4.98)</b>   | <b>0.011</b>     |
| Never brought child for well-child visit                 | 6/104 (5.8)                           | 3/174 (1.7)                             | 3.08 (0.73 - 12.99)         | 0.125            |
| No or incomplete prenatal care                           | 30/102 (29.4)                         | 42/172 (24.4)                           | 1.21 (0.67 - 2.20)          | 0.512            |
| <b>Biological characteristics</b>                        |                                       |                                         |                             |                  |
| Male sex                                                 | 53/104 (50.9)                         | 81/174 (46.5)                           | 1.28 (0.77 - 2.15)          | 0.342            |
| Prematurity                                              | 17/104 (16.4)                         | 20/174 (11.49)                          | 1.70 (0.82 - 3.50)          | 0.151            |
| NICU admission                                           | 36/104 (34.6)                         | 31/174 (17.8)                           | <b>3.16 (1.67 - 5.99)</b>   | <b>&lt;0.001</b> |
| Low birth weight (LBW)                                   | 16/104 (15.4)                         | 11/174 (6.3)                            | <b>3.10 (1.14 - 8.45)</b>   | <b>0.027</b>     |
| Congenital malformation                                  | 6/104 (5.8)                           | 4/174 (2.3)                             | 3 (0.85 - 10.63)            | 0.089            |
| <b>Events during last disease episode</b>                |                                       |                                         |                             |                  |
| Signs of moderate or severe illness                      | 36/104 (34.6)                         | 65/174 (37.4)                           | 0.81 (0.41 - 1.58)          | 0.537            |
| No PCC/ER visit during last illness                      | 22/104 (21.1)                         | 2/174 (1.1)                             | <b>14.20 (3.26 - 61.79)</b> | <b>&lt;0.001</b> |
| Risk for sudden infant death syndrome                    | 72/104 (69.2)                         | 109/174 (62.6)                          | 1.53 (0.85 - 2.78)          | 0.157            |
