# Supplementary material for: Mortality Associated With Acute Respiratory Infections Among Children at Home
Source: PubMed Central journal article supplement (PMC6325348; doi:10.1093/infdis/jiy517), 2018-08-28
Supplement: jiy517_suppl_supplementary_table_2.pdf [file jiy517_suppl_supplementary_table_2.pdf]

**Supplementary table 2.** Hierarchical multivariable analysis: Risk Factors community death in under 5 years old children

|                                           | Level 1                    |                  | Level 2                    |                  | Level 3                     |                  |
|-------------------------------------------|----------------------------|------------------|----------------------------|------------------|-----------------------------|------------------|
|                                           | Odds ratio (95% IC)        | <i>p</i>         | Odds ratio (95% IC)        | <i>p</i>         | Odds ratio (95% IC)         | <i>p</i>         |
| No running water                          | 3.32 (0.89 - 12.42)        | 0.074            | 3.79 (0.90 - 15.96)        | 0.069            | 3 (0.61 - 14.56)            | 0.173            |
| Crowding (more than 3 person per bedroom) | <b>3.61 (1.76 - 7.41)</b>  | <b>&lt;0.001</b> | <b>4.27 (1.89 - 9.69)</b>  | <b>0.001</b>     | <b>4.05 (1.69 - 9.69)</b>   | <b>0.002</b>     |
| Adolescent mother (<19 years)             | <b>7.18 (2.46 - 20.95)</b> | <b>&lt;0.001</b> | <b>7.08 (2.30 - 21.80)</b> | <b>0.001</b>     | <b>8.37 (2.25 - 31.11)</b>  | <b>0.002</b>     |
| Does not receive state aid                | <b>4.63 (2.10 - 10.21)</b> | <b>&lt;0.001</b> | <b>6.35 (2.62 - 15.40)</b> | <b>&lt;0.001</b> | <b>6.39 (2.50 - 16.36)</b>  | <b>&lt;0.001</b> |
| Incomplete vaccination                    | <b>2.49 (1.03 - 5.99)</b>  | <b>0.042</b>     | <b>2.68 (1.01 - 7.13)</b>  | <b>0.048</b>     | <b>3.91 (1.24 - 12.27)</b>  | <b>0.019</b>     |
| NICU admission                            |                            |                  | <b>5.22 (1.96 - 13.89)</b> | <b>0.001</b>     | <b>6.64 (2.23 - 19.73)</b>  | <b>0.001</b>     |
| Low birth weight                          |                            |                  | 1.57 (0.32 - 7.64)         | 0.576            | 1.59 (0.32 - 7.93)          | 0.572            |
| No PCC/ER visit during last illness       |                            |                  |                            |                  | <b>16.27 (2.74 - 96.57)</b> | <b>0.002</b>     |
