# Supplementary material for: Mortality Associated With Acute Respiratory Infections Among Children at Home
Source: J Infect Dis. 2018 Aug 28;219(3):358–64. doi: 10.1093/infdis/jiy517 (PMC6325348; doi:10.1093/infdis/jiy517)
Supplement: Supplementary Form [file jiy517_suppl_supplementary_form.pdf]

|                                                                                 |                                                                                                                                        |                                                                                                                                                                                                                                                                                                                                                                                                                                                                                                                                                 |                                           |  |                                              |                                            |                                                |                                                |                                                             |                                                           |                                    |                                |                                   |                                |
|---------------------------------------------------------------------------------|----------------------------------------------------------------------------------------------------------------------------------------|-------------------------------------------------------------------------------------------------------------------------------------------------------------------------------------------------------------------------------------------------------------------------------------------------------------------------------------------------------------------------------------------------------------------------------------------------------------------------------------------------------------------------------------------------|-------------------------------------------|--|----------------------------------------------|--------------------------------------------|------------------------------------------------|------------------------------------------------|-------------------------------------------------------------|-----------------------------------------------------------|------------------------------------|--------------------------------|-----------------------------------|--------------------------------|
| <b>FICHA</b>                                                                    | <b>MORTALIDAD INFANTIL DOMICILIARIA</b>                                                                                                |                                                                                                                                                                                                                                                                                                                                                                                                                                                                                                                                                 | Florencio Varela <input type="checkbox"/> |  |                                              |                                            |                                                |                                                |                                                             |                                                           |                                    |                                |                                   |                                |
|                                                                                 | Fundación Infant - Versión 2.1 - Octubre 2016                                                                                          |                                                                                                                                                                                                                                                                                                                                                                                                                                                                                                                                                 | Lomas de Zamora <input type="checkbox"/>  |  |                                              |                                            |                                                |                                                |                                                             |                                                           |                                    |                                |                                   |                                |
| <b>DATOS DEL ENTREVISTADO</b> <span style="float: right;"><b>A</b></span>       |                                                                                                                                        |                                                                                                                                                                                                                                                                                                                                                                                                                                                                                                                                                 |                                           |  |                                              |                                            |                                                |                                                |                                                             |                                                           |                                    |                                |                                   |                                |
| <b>DATOS PERSONALES</b> <span style="float: right;"><b>I</b></span>             |                                                                                                                                        |                                                                                                                                                                                                                                                                                                                                                                                                                                                                                                                                                 |                                           |  |                                              |                                            |                                                |                                                |                                                             |                                                           |                                    |                                |                                   |                                |
|                                                                                 | ¿Cuál fue la fecha del Fallecimiento de el/la niño?                                                                                    | <input type="text"/> <input type="text"/> / <input type="text"/> <input type="text"/> / <input type="text"/> <input type="text"/> <input type="text"/>                                                                                                                                                                                                                                                                                                                                                                                          |                                           |  |                                              |                                            |                                                |                                                |                                                             |                                                           |                                    |                                |                                   |                                |
| 1.                                                                              | Marcar con una cruz las personas que participan de la entrevista en relación al niño fallecido.<br>(Marque todas las que corresponda). | <table border="0"> <tr> <td><input type="checkbox"/> Madre</td> <td><input type="checkbox"/> No familiar</td> </tr> <tr> <td><input type="checkbox"/> Padre</td> <td><input type="checkbox"/> Otro menor de 12 años</td> </tr> <tr> <td><input type="checkbox"/> Tío/a</td> <td><input type="checkbox"/> Otro mayor de 12 años</td> </tr> <tr> <td><input type="checkbox"/> Hermano/a</td> <td><input type="checkbox"/> Omite</td> </tr> <tr> <td><input type="checkbox"/> Abuelo/a</td> <td><input type="checkbox"/> Ns/Nc</td> </tr> </table> |                                           |  | <input type="checkbox"/> Madre               | <input type="checkbox"/> No familiar       | <input type="checkbox"/> Padre                 | <input type="checkbox"/> Otro menor de 12 años | <input type="checkbox"/> Tío/a                              | <input type="checkbox"/> Otro mayor de 12 años            | <input type="checkbox"/> Hermano/a | <input type="checkbox"/> Omite | <input type="checkbox"/> Abuelo/a | <input type="checkbox"/> Ns/Nc |
| <input type="checkbox"/> Madre                                                  | <input type="checkbox"/> No familiar                                                                                                   |                                                                                                                                                                                                                                                                                                                                                                                                                                                                                                                                                 |                                           |  |                                              |                                            |                                                |                                                |                                                             |                                                           |                                    |                                |                                   |                                |
| <input type="checkbox"/> Padre                                                  | <input type="checkbox"/> Otro menor de 12 años                                                                                         |                                                                                                                                                                                                                                                                                                                                                                                                                                                                                                                                                 |                                           |  |                                              |                                            |                                                |                                                |                                                             |                                                           |                                    |                                |                                   |                                |
| <input type="checkbox"/> Tío/a                                                  | <input type="checkbox"/> Otro mayor de 12 años                                                                                         |                                                                                                                                                                                                                                                                                                                                                                                                                                                                                                                                                 |                                           |  |                                              |                                            |                                                |                                                |                                                             |                                                           |                                    |                                |                                   |                                |
| <input type="checkbox"/> Hermano/a                                              | <input type="checkbox"/> Omite                                                                                                         |                                                                                                                                                                                                                                                                                                                                                                                                                                                                                                                                                 |                                           |  |                                              |                                            |                                                |                                                |                                                             |                                                           |                                    |                                |                                   |                                |
| <input type="checkbox"/> Abuelo/a                                               | <input type="checkbox"/> Ns/Nc                                                                                                         |                                                                                                                                                                                                                                                                                                                                                                                                                                                                                                                                                 |                                           |  |                                              |                                            |                                                |                                                |                                                             |                                                           |                                    |                                |                                   |                                |
| 2.                                                                              | ¿Quién es el/la principal interlocutor/a?                                                                                              | <table border="0"> <tr> <td><input type="checkbox"/> Madre</td> <td><input type="checkbox"/> No familiar</td> </tr> <tr> <td><input type="checkbox"/> Padre</td> <td><input type="checkbox"/> Otro menor de 12 años</td> </tr> <tr> <td><input type="checkbox"/> Tío/a</td> <td><input type="checkbox"/> Otro mayor de 12 años</td> </tr> <tr> <td><input type="checkbox"/> Hermano/a</td> <td><input type="checkbox"/> Omite</td> </tr> <tr> <td><input type="checkbox"/> Abuelo/a</td> <td><input type="checkbox"/> Ns/Nc</td> </tr> </table> |                                           |  | <input type="checkbox"/> Madre               | <input type="checkbox"/> No familiar       | <input type="checkbox"/> Padre                 | <input type="checkbox"/> Otro menor de 12 años | <input type="checkbox"/> Tío/a                              | <input type="checkbox"/> Otro mayor de 12 años            | <input type="checkbox"/> Hermano/a | <input type="checkbox"/> Omite | <input type="checkbox"/> Abuelo/a | <input type="checkbox"/> Ns/Nc |
| <input type="checkbox"/> Madre                                                  | <input type="checkbox"/> No familiar                                                                                                   |                                                                                                                                                                                                                                                                                                                                                                                                                                                                                                                                                 |                                           |  |                                              |                                            |                                                |                                                |                                                             |                                                           |                                    |                                |                                   |                                |
| <input type="checkbox"/> Padre                                                  | <input type="checkbox"/> Otro menor de 12 años                                                                                         |                                                                                                                                                                                                                                                                                                                                                                                                                                                                                                                                                 |                                           |  |                                              |                                            |                                                |                                                |                                                             |                                                           |                                    |                                |                                   |                                |
| <input type="checkbox"/> Tío/a                                                  | <input type="checkbox"/> Otro mayor de 12 años                                                                                         |                                                                                                                                                                                                                                                                                                                                                                                                                                                                                                                                                 |                                           |  |                                              |                                            |                                                |                                                |                                                             |                                                           |                                    |                                |                                   |                                |
| <input type="checkbox"/> Hermano/a                                              | <input type="checkbox"/> Omite                                                                                                         |                                                                                                                                                                                                                                                                                                                                                                                                                                                                                                                                                 |                                           |  |                                              |                                            |                                                |                                                |                                                             |                                                           |                                    |                                |                                   |                                |
| <input type="checkbox"/> Abuelo/a                                               | <input type="checkbox"/> Ns/Nc                                                                                                         |                                                                                                                                                                                                                                                                                                                                                                                                                                                                                                                                                 |                                           |  |                                              |                                            |                                                |                                                |                                                             |                                                           |                                    |                                |                                   |                                |
| 3.                                                                              | En caso en que la madre del niño fallecido no fue la principal interlocutora, explicar el principal motivo.                            | <div style="border: 1px solid black; height: 40px; width: 100%;"></div> <table border="0"> <tr> <td><input type="checkbox"/> Omite</td> <td><input type="checkbox"/> Ns/Nc</td> </tr> </table>                                                                                                                                                                                                                                                                                                                                                  |                                           |  | <input type="checkbox"/> Omite               | <input type="checkbox"/> Ns/Nc             |                                                |                                                |                                                             |                                                           |                                    |                                |                                   |                                |
| <input type="checkbox"/> Omite                                                  | <input type="checkbox"/> Ns/Nc                                                                                                         |                                                                                                                                                                                                                                                                                                                                                                                                                                                                                                                                                 |                                           |  |                                              |                                            |                                                |                                                |                                                             |                                                           |                                    |                                |                                   |                                |
| 4.                                                                              | ¿Cuál es el mayor nivel educativo alcanzado de el/la principal interlocutor/a?                                                         | <table border="0"> <tr><td><input type="checkbox"/> Primaria incompleta</td></tr> <tr><td><input type="checkbox"/> Primaria completa</td></tr> <tr><td><input type="checkbox"/> Secundaria incompleta</td></tr> <tr><td><input type="checkbox"/> Secundaria completa</td></tr> <tr><td><input type="checkbox"/> Terciario/Universitario incompleto</td></tr> <tr><td><input type="checkbox"/> Terciario/Universitario completo</td></tr> <tr> <td><input type="checkbox"/> Omite</td> <td><input type="checkbox"/> Ns/Nc</td> </tr> </table>    |                                           |  | <input type="checkbox"/> Primaria incompleta | <input type="checkbox"/> Primaria completa | <input type="checkbox"/> Secundaria incompleta | <input type="checkbox"/> Secundaria completa   | <input type="checkbox"/> Terciario/Universitario incompleto | <input type="checkbox"/> Terciario/Universitario completo | <input type="checkbox"/> Omite     | <input type="checkbox"/> Ns/Nc |                                   |                                |
| <input type="checkbox"/> Primaria incompleta                                    |                                                                                                                                        |                                                                                                                                                                                                                                                                                                                                                                                                                                                                                                                                                 |                                           |  |                                              |                                            |                                                |                                                |                                                             |                                                           |                                    |                                |                                   |                                |
| <input type="checkbox"/> Primaria completa                                      |                                                                                                                                        |                                                                                                                                                                                                                                                                                                                                                                                                                                                                                                                                                 |                                           |  |                                              |                                            |                                                |                                                |                                                             |                                                           |                                    |                                |                                   |                                |
| <input type="checkbox"/> Secundaria incompleta                                  |                                                                                                                                        |                                                                                                                                                                                                                                                                                                                                                                                                                                                                                                                                                 |                                           |  |                                              |                                            |                                                |                                                |                                                             |                                                           |                                    |                                |                                   |                                |
| <input type="checkbox"/> Secundaria completa                                    |                                                                                                                                        |                                                                                                                                                                                                                                                                                                                                                                                                                                                                                                                                                 |                                           |  |                                              |                                            |                                                |                                                |                                                             |                                                           |                                    |                                |                                   |                                |
| <input type="checkbox"/> Terciario/Universitario incompleto                     |                                                                                                                                        |                                                                                                                                                                                                                                                                                                                                                                                                                                                                                                                                                 |                                           |  |                                              |                                            |                                                |                                                |                                                             |                                                           |                                    |                                |                                   |                                |
| <input type="checkbox"/> Terciario/Universitario completo                       |                                                                                                                                        |                                                                                                                                                                                                                                                                                                                                                                                                                                                                                                                                                 |                                           |  |                                              |                                            |                                                |                                                |                                                             |                                                           |                                    |                                |                                   |                                |
| <input type="checkbox"/> Omite                                                  | <input type="checkbox"/> Ns/Nc                                                                                                         |                                                                                                                                                                                                                                                                                                                                                                                                                                                                                                                                                 |                                           |  |                                              |                                            |                                                |                                                |                                                             |                                                           |                                    |                                |                                   |                                |
| 5.                                                                              | El principal interlocutor, ¿se encontraba presente en el evento de muerte?                                                             | <table border="0"> <tr> <td><input type="checkbox"/> Si</td> <td><input type="checkbox"/> No</td> </tr> <tr> <td><input type="checkbox"/> Omite</td> <td><input type="checkbox"/> Ns/Nc</td> </tr> </table>                                                                                                                                                                                                                                                                                                                                     |                                           |  | <input type="checkbox"/> Si                  | <input type="checkbox"/> No                | <input type="checkbox"/> Omite                 | <input type="checkbox"/> Ns/Nc                 |                                                             |                                                           |                                    |                                |                                   |                                |
| <input type="checkbox"/> Si                                                     | <input type="checkbox"/> No                                                                                                            |                                                                                                                                                                                                                                                                                                                                                                                                                                                                                                                                                 |                                           |  |                                              |                                            |                                                |                                                |                                                             |                                                           |                                    |                                |                                   |                                |
| <input type="checkbox"/> Omite                                                  | <input type="checkbox"/> Ns/Nc                                                                                                         |                                                                                                                                                                                                                                                                                                                                                                                                                                                                                                                                                 |                                           |  |                                              |                                            |                                                |                                                |                                                             |                                                           |                                    |                                |                                   |                                |
| <b>ANTECEDENTES DEL NIÑO</b> <span style="float: right;"><b>B</b></span>        |                                                                                                                                        |                                                                                                                                                                                                                                                                                                                                                                                                                                                                                                                                                 |                                           |  |                                              |                                            |                                                |                                                |                                                             |                                                           |                                    |                                |                                   |                                |
| <b>ANTECEDENTES PERINATOLOGICOS</b> <span style="float: right;"><b>I</b></span> |                                                                                                                                        |                                                                                                                                                                                                                                                                                                                                                                                                                                                                                                                                                 |                                           |  |                                              |                                            |                                                |                                                |                                                             |                                                           |                                    |                                |                                   |                                |
| 1.                                                                              | ¿Cuál fue la fecha del nacimiento de el/la niño/a?                                                                                     | <input type="text"/> <input type="text"/> / <input type="text"/> <input type="text"/> / <input type="text"/> <input type="text"/> <input type="text"/>                                                                                                                                                                                                                                                                                                                                                                                          |                                           |  |                                              |                                            |                                                |                                                |                                                             |                                                           |                                    |                                |                                   |                                |
| 2.                                                                              | ¿Qué número de orden era el/la niño/a?                                                                                                 | <input type="text"/> <input type="text"/> <table border="0"> <tr> <td><input type="checkbox"/> Omite</td> <td><input type="checkbox"/> Ns/Nc</td> </tr> </table>                                                                                                                                                                                                                                                                                                                                                                                |                                           |  | <input type="checkbox"/> Omite               | <input type="checkbox"/> Ns/Nc             |                                                |                                                |                                                             |                                                           |                                    |                                |                                   |                                |
| <input type="checkbox"/> Omite                                                  | <input type="checkbox"/> Ns/Nc                                                                                                         |                                                                                                                                                                                                                                                                                                                                                                                                                                                                                                                                                 |                                           |  |                                              |                                            |                                                |                                                |                                                             |                                                           |                                    |                                |                                   |                                |

Identificación del Paciente: \_\_\_\_ - \_\_\_\_ - \_\_\_\_ - \_\_\_\_ - \_\_\_\_

| FICHA |                                                                               | MORTALIDAD INFANTIL DOMICILIARIA<br>Fundación Infant - Versión 2.1 - Octubre 2016                                                                                                                 |                                                                                                                                    | Florencio Varela <input type="checkbox"/><br>Lomas de Zamora <input type="checkbox"/> |  |
|-------|-------------------------------------------------------------------------------|---------------------------------------------------------------------------------------------------------------------------------------------------------------------------------------------------|------------------------------------------------------------------------------------------------------------------------------------|---------------------------------------------------------------------------------------|--|
| 3.    | ¿Tenía documento de identidad antes de fallecer?                              | <input type="checkbox"/> Si<br><input type="checkbox"/> Omite                                                                                                                                     | <input type="checkbox"/> No<br><input type="checkbox"/> Ns/Nc                                                                      |                                                                                       |  |
| 4.    | ¿Cuándo le eligieron el nombre?                                               | <input type="checkbox"/> Antes de nacer<br><input type="checkbox"/> Omite                                                                                                                         | <input type="checkbox"/> Después de nacer<br><input type="checkbox"/> Ns/Nc                                                        |                                                                                       |  |
| 5.    | ¿Dónde nació?                                                                 | <input type="checkbox"/> Hospital público<br><input type="checkbox"/> Hospital privado<br><input type="checkbox"/> En la casa<br><input type="checkbox"/> Omite<br><input type="checkbox"/> Ns/Nc | <input type="checkbox"/> Centro de salud<br><input type="checkbox"/> Obra social<br><input type="checkbox"/> Otro ↓<br><div></div> |                                                                                       |  |
| 6.    | En caso de haber nacido en una institución, escribir el nombre:               | <div></div>                                                                                                                                                                                       |                                                                                                                                    |                                                                                       |  |
| 7.    | Lugar de nacimiento:                                                          | Ciudad: <div></div><br>País: <div></div><br><input type="checkbox"/> Omite <input type="checkbox"/> Ns/Nc                                                                                         |                                                                                                                                    |                                                                                       |  |
| 8.    | ¿Cuál era el sexo de el/la niño/a?                                            | <input type="checkbox"/> Femenino                                                                                                                                                                 | <input type="checkbox"/> Masculino                                                                                                 |                                                                                       |  |
| 9.    | El embarazo del niño/a ¿fue único o múltiple?                                 | <input type="checkbox"/> Único<br><input type="checkbox"/> Omite                                                                                                                                  | <input type="checkbox"/> Múltiple, número <div></div><br><input type="checkbox"/> Ns/Nc                                            |                                                                                       |  |
| 10.   | ¿Cómo fue el parto?                                                           | <input type="checkbox"/> Vaginal<br><input type="checkbox"/> Omite<br><input type="checkbox"/> Ns/Nc                                                                                              | <input type="checkbox"/> Cesárea, Motivo ↓<br><div></div>                                                                          |                                                                                       |  |
| 11.   | ¿Cuántas semanas de gestación tenía al nacer?                                 | <div><div></div><div></div></div> semanas<br><input type="checkbox"/> Omite                                                                                                                       | <input type="checkbox"/> Ns/Nc                                                                                                     |                                                                                       |  |
| 12.   | Si nació con menos de 38 semanas de gestación, ¿recibió la madre corticoides? | <input type="checkbox"/> Si<br><input type="checkbox"/> Omite                                                                                                                                     | <input type="checkbox"/> No<br><input type="checkbox"/> Ns/Nc                                                                      |                                                                                       |  |
| 13.   | ¿Cuánto pesó el/la niño/a al nacer?                                           | <div><div></div><div></div><div></div><div></div></div> gramos<br><input type="checkbox"/> Omite                                                                                                  | <input type="checkbox"/> Ns/Nc                                                                                                     |                                                                                       |  |
| 14.   | ¿Cuánto midió el/la niño/a al nacer?                                          | <div><div></div><div></div></div> cm<br><input type="checkbox"/> Omite                                                                                                                            | <input type="checkbox"/> Ns/Nc                                                                                                     |                                                                                       |  |

Identificación del Paciente: \_\_\_\_ - \_\_\_\_ - \_\_\_\_ - \_\_\_\_ - \_\_\_\_

| FICHA                                                                |                                                                                              | MORTALIDAD INFANTIL DOMICILIARIA<br>Fundación Infant - Versión 2.1 - Octubre 2016                                                                                                                                                                                                                                                                                                                                                                   |  | Florencio Varela <input type="checkbox"/><br>Lomas de Zamora <input type="checkbox"/> |  |
|----------------------------------------------------------------------|----------------------------------------------------------------------------------------------|-----------------------------------------------------------------------------------------------------------------------------------------------------------------------------------------------------------------------------------------------------------------------------------------------------------------------------------------------------------------------------------------------------------------------------------------------------|--|---------------------------------------------------------------------------------------|--|
| 15.                                                                  | ¿Cuál fue el perímetro cefálico de el/la niño/a al nacer?                                    | <input type="text"/> <input type="text"/> cm<br><input type="checkbox"/> Omite <input type="checkbox"/> Ns/Nc                                                                                                                                                                                                                                                                                                                                       |  |                                                                                       |  |
| 16.                                                                  | Anotar cuál fue al Apgar al minuto y a los cinco minutos de nacer                            | <input type="text"/> <input type="text"/> 1 minuto <input type="text"/> <input type="text"/> 5 minutos<br><input type="checkbox"/> Omite <input type="checkbox"/> Ns/Nc                                                                                                                                                                                                                                                                             |  |                                                                                       |  |
| 17.                                                                  | ¿Requirió el/la bebé internación en neonatología al nacer o antes del alta de la maternidad? | <input type="checkbox"/> Si <input type="checkbox"/> No<br><input type="checkbox"/> Omite <input type="checkbox"/> Ns/Nc                                                                                                                                                                                                                                                                                                                            |  |                                                                                       |  |
| <b>(Si la respuesta es No, Omite o Ns/Nc pasar a la pregunta 23)</b> |                                                                                              |                                                                                                                                                                                                                                                                                                                                                                                                                                                     |  |                                                                                       |  |
| 18.                                                                  | Diagnóstico al ingreso en neonatología: marque todos los que corresponda.                    | <input type="checkbox"/> Sepsis <input type="checkbox"/> Prematurez<br><input type="checkbox"/> Problemas pulmonares <input type="checkbox"/> Otro, especificar ↓<br><input type="checkbox"/> Omite <input type="text"/><br><input type="checkbox"/> Ns/Nc                                                                                                                                                                                          |  |                                                                                       |  |
| 19.                                                                  | ¿Tuvo otras enfermedades o complicaciones durante la internación en neonatología?            | <input type="checkbox"/> Si, cual/es? → <input type="text"/><br><input type="checkbox"/> No<br><input type="checkbox"/> Omite <input type="checkbox"/> Ns/Nc                                                                                                                                                                                                                                                                                        |  |                                                                                       |  |
| 20.                                                                  | ¿Requirió oxígeno en la internación (incluyendo ARM)?                                        | <input type="checkbox"/> Si → <input type="text"/> días<br><input type="checkbox"/> No<br><input type="checkbox"/> Omite <input type="checkbox"/> Ns/Nc                                                                                                                                                                                                                                                                                             |  |                                                                                       |  |
| 21.                                                                  | ¿Requirió asistencia respiratoria mecánica?                                                  | <input type="checkbox"/> Si → <input type="text"/> días<br><input type="checkbox"/> No<br><input type="checkbox"/> Omite <input type="checkbox"/> Ns/Nc                                                                                                                                                                                                                                                                                             |  |                                                                                       |  |
| 22.                                                                  | Al alta de neonatología, ¿requirió oxígeno suplementario?                                    | <input type="checkbox"/> Si <input type="checkbox"/> No<br><input type="checkbox"/> Omite <input type="checkbox"/> Ns/Nc                                                                                                                                                                                                                                                                                                                            |  |                                                                                       |  |
| 23.                                                                  | ¿Tuvo el/la niño/a cuando nació diagnóstico de infección perinatal confirmada?               | <input type="checkbox"/> Si, cual/es? →<br><input type="checkbox"/> HIV<br><input type="checkbox"/> Sífilis<br><input type="checkbox"/> Chagas<br><input type="checkbox"/> Toxoplasmosis<br><input type="checkbox"/> Citomegalovirus<br><input type="checkbox"/> Streptococo B<br><input type="checkbox"/> Otro, especificar ↓<br><input type="checkbox"/> No <input type="text"/><br><input type="checkbox"/> Omite <input type="checkbox"/> Ns/Nc |  |                                                                                       |  |

Identificación del Paciente: \_\_\_\_ - \_\_\_\_ - \_\_\_\_ - \_\_\_\_ - \_\_\_\_

Codificación: dos letras nombre, dos letras apellido y fecha de nacimiento

| FICHA                                                          |                                                                                                             | MORTALIDAD INFANTIL DOMICILIARIA<br>Fundación Infant - Versión 2.1 - Octubre 2016                                                                                                                                                                                                                 |                                                               | Florencio Varela <input type="checkbox"/><br>Lomas de Zamora <input type="checkbox"/> |  |
|----------------------------------------------------------------|-------------------------------------------------------------------------------------------------------------|---------------------------------------------------------------------------------------------------------------------------------------------------------------------------------------------------------------------------------------------------------------------------------------------------|---------------------------------------------------------------|---------------------------------------------------------------------------------------|--|
| 24.                                                            | Luego del nacimiento y hasta el alta de la maternidad, ¿la internación fue conjunta madre- hijo/a?          | <input type="checkbox"/> Si<br><input type="checkbox"/> Omite                                                                                                                                                                                                                                     | <input type="checkbox"/> No<br><input type="checkbox"/> Ns/Nc |                                                                                       |  |
| 25.                                                            | Durante la internación conjunta ¿cómo se alimentó el/la niño/a?                                             | <input type="checkbox"/> Pecho exclusivo<br><input type="checkbox"/> Alimentación solo mamadera suplemento de leche (NO LECHE HUMANA)<br><input type="checkbox"/> Pecho más complemento<br><input type="checkbox"/> Omite <input type="checkbox"/> Ns/Nc                                          |                                                               |                                                                                       |  |
| 26.                                                            | ¿Fue amamantado el/la niño/a dentro del plazo de una hora de su nacimiento?                                 | <input type="checkbox"/> Si<br><input type="checkbox"/> Omite                                                                                                                                                                                                                                     | <input type="checkbox"/> No<br><input type="checkbox"/> Ns/Nc |                                                                                       |  |
| 27.                                                            | ¿Cómo puede describir que era su niño/a durante los primeros días de vida (marque todo lo que corresponda)? | <input type="checkbox"/> Tranquilo <input type="checkbox"/> Irritable<br><input type="checkbox"/> Dormilón <input type="checkbox"/> Siempre estaba con hambre<br><input type="checkbox"/> Otro: Especificar <input type="text"/><br><input type="checkbox"/> Omite <input type="checkbox"/> Ns/Nc |                                                               |                                                                                       |  |
| 28.                                                            | ¿Quién estuvo cuidándolo/a principalmente en la primera semana de vida?                                     | <input type="checkbox"/> La mama <input type="checkbox"/> La mama con el papa<br><input type="checkbox"/> La mamá con ayuda permanente<br><input type="checkbox"/> Otro: Especificar <input type="text"/><br><input type="checkbox"/> Omite <input type="checkbox"/> Ns/Nc                        |                                                               |                                                                                       |  |
| 29.                                                            | ¿Donde dormía habitualmente el/la niño/a hasta los 6 meses de vida?                                         | <input type="checkbox"/> Cama compartida <input type="checkbox"/> Cuna solo/a<br><input type="checkbox"/> Otro: Especificar <input type="text"/><br><input type="checkbox"/> Omite <input type="checkbox"/> Ns/Nc                                                                                 |                                                               |                                                                                       |  |
| 30.                                                            | ¿Con quién compartía la cama?                                                                               | <input type="text"/><br><input type="checkbox"/> Omite <input type="checkbox"/> Ns/Nc                                                                                                                                                                                                             |                                                               |                                                                                       |  |
| 31.                                                            | ¿En qué posición dormía habitualmente?                                                                      | <input type="checkbox"/> Boca arriba<br><input type="checkbox"/> Boca abajo<br><input type="checkbox"/> De costado<br><input type="checkbox"/> Omite <input type="checkbox"/> Ns/Nc                                                                                                               |                                                               |                                                                                       |  |
| PERCEPCIONES DE LA MADRE <span style="float: right;">II</span> |                                                                                                             |                                                                                                                                                                                                                                                                                                   |                                                               |                                                                                       |  |
| 1.                                                             | ¿Tu hijo/a era como lo esperabas?                                                                           | <input type="checkbox"/> Si<br><input type="checkbox"/> Omite                                                                                                                                                                                                                                     | <input type="checkbox"/> No<br><input type="checkbox"/> Ns/Nc |                                                                                       |  |
| 2.                                                             | ¿Te resultó fácil su crianza?                                                                               | <input type="checkbox"/> Si<br><input type="checkbox"/> Omite                                                                                                                                                                                                                                     | <input type="checkbox"/> No<br><input type="checkbox"/> Ns/Nc |                                                                                       |  |

Identificación del Paciente: \_\_\_\_ - \_\_\_\_ - \_\_\_\_ - \_\_\_\_ - \_\_\_\_

| FICHA                                                             |                                                                                                                                                                                           | MORTALIDAD INFANTIL DOMICILIARIA<br>Fundación Infant - Versión 2.1 - Octubre 2016                                                                                                                                                                                                                                                                                                                                                                                                                                                                                                                                                                                                                                             |  | Florencio Varela <input type="checkbox"/><br>Lomas de Zamora <input type="checkbox"/> |  |
|-------------------------------------------------------------------|-------------------------------------------------------------------------------------------------------------------------------------------------------------------------------------------|-------------------------------------------------------------------------------------------------------------------------------------------------------------------------------------------------------------------------------------------------------------------------------------------------------------------------------------------------------------------------------------------------------------------------------------------------------------------------------------------------------------------------------------------------------------------------------------------------------------------------------------------------------------------------------------------------------------------------------|--|---------------------------------------------------------------------------------------|--|
| 3.                                                                | ¿Cómo puede describir que era la salud de su niño/a en general?                                                                                                                           | <input type="text"/><br><input type="checkbox"/> Omite <input type="checkbox"/> Ns/Nc                                                                                                                                                                                                                                                                                                                                                                                                                                                                                                                                                                                                                                         |  |                                                                                       |  |
| ALIMENTACION <span style="float: right;">III</span>               |                                                                                                                                                                                           |                                                                                                                                                                                                                                                                                                                                                                                                                                                                                                                                                                                                                                                                                                                               |  |                                                                                       |  |
| 1.                                                                | Con respecto a la alimentación habitual de el/la niño/a , durante el primer año de vida, ¿Qué alimentos consumió?<br><br>Marcar todas las opciones que correspondan, desde su nacimiento. | <div>Lactancia materna</div> <input type="checkbox"/> Si <input type="checkbox"/> No <input type="checkbox"/> Ns/Nc <input type="checkbox"/> Omite<br><div>Leche complemento</div> <input type="checkbox"/> Si <input type="checkbox"/> No <input type="checkbox"/> Ns/Nc <input type="checkbox"/> Omite<br><div>Otros líquidos</div> <input type="checkbox"/> Si <input type="checkbox"/> No <input type="checkbox"/> Ns/Nc <input type="checkbox"/> Omite<br><div>Semisólidos/sólidos</div> <input type="checkbox"/> Si <input type="checkbox"/> No <input type="checkbox"/> Ns/Nc <input type="checkbox"/> Omite                                                                                                           |  |                                                                                       |  |
| La siguiente pregunta corresponde solo a niños mayores de 5 meses |                                                                                                                                                                                           |                                                                                                                                                                                                                                                                                                                                                                                                                                                                                                                                                                                                                                                                                                                               |  |                                                                                       |  |
| 2.                                                                | ¿Puede describir como era la alimentación de el/la niño/a en los últimos 3 meses de vida?                                                                                                 | <input type="text"/>                                                                                                                                                                                                                                                                                                                                                                                                                                                                                                                                                                                                                                                                                                          |  |                                                                                       |  |
| 3.                                                                | ¿Dónde realizaba la mayor parte de las comidas?<br><br>Marcar todas las opciones posibles.                                                                                                | <input type="checkbox"/> Hogar <input type="checkbox"/> Comedor comunitario<br><input type="checkbox"/> Jardín/Escuela<br><input type="checkbox"/> Otro: Especificar <input type="text"/><br><input type="checkbox"/> Omite <input type="checkbox"/> Ns/Nc                                                                                                                                                                                                                                                                                                                                                                                                                                                                    |  |                                                                                       |  |
| 4.                                                                | ¿Qué comidas realizaba habitualmente en el día?<br><br>Marcar todas las opciones posibles.                                                                                                | <input type="checkbox"/> Desayuno <input type="checkbox"/> Almuerzo<br><input type="checkbox"/> Merienda <input type="checkbox"/> Cena<br><input type="checkbox"/> Omite <input type="checkbox"/> Ns/Nc                                                                                                                                                                                                                                                                                                                                                                                                                                                                                                                       |  |                                                                                       |  |
| 5.                                                                | ¿Consumía estos alimentos al menos una vez a la semana?<br><br>Marcar todas las opciones posibles.                                                                                        | <input type="checkbox"/> Verduras verdes <input type="checkbox"/> Otras verduras<br><input type="checkbox"/> Arroz, pastas <input type="checkbox"/> Carnes rojas<br><input type="checkbox"/> Pollo <input type="checkbox"/> Pescado<br><input type="checkbox"/> Frutas <input type="checkbox"/> Agua segura<br><input type="checkbox"/> Agua no segura <input type="checkbox"/> Cereales, legumbres<br><input type="checkbox"/> Huevos <input type="checkbox"/> Lácteos(leche, crema, quesos. etc.)<br><input type="checkbox"/> Aceite de cocina (Solo si utiliza aceite crudo, no frito)<br><input type="checkbox"/> Otro: Especificar <input type="text"/><br><input type="checkbox"/> Omite <input type="checkbox"/> Ns/Nc |  |                                                                                       |  |

Identificación del Paciente: \_\_\_\_ - \_\_\_\_ - \_\_\_\_ - \_\_\_\_ - \_\_\_\_

|                                                              |                                                                                                                              |                                                                                                                                                                                                                                                                                                                                                                                                                                                                                                                                                                                                                                                                                           |                  |                          |
|--------------------------------------------------------------|------------------------------------------------------------------------------------------------------------------------------|-------------------------------------------------------------------------------------------------------------------------------------------------------------------------------------------------------------------------------------------------------------------------------------------------------------------------------------------------------------------------------------------------------------------------------------------------------------------------------------------------------------------------------------------------------------------------------------------------------------------------------------------------------------------------------------------|------------------|--------------------------|
| FICHA                                                        | MORTALIDAD INFANTIL DOMICILIARIA                                                                                             |                                                                                                                                                                                                                                                                                                                                                                                                                                                                                                                                                                                                                                                                                           | Florencio Varela | <input type="checkbox"/> |
|                                                              | Fundación Infant - Versión 2.1 - Octubre 2016                                                                                |                                                                                                                                                                                                                                                                                                                                                                                                                                                                                                                                                                                                                                                                                           | Lomas de Zamora  | <input type="checkbox"/> |
| CONTROLES DE SALUD                                           |                                                                                                                              |                                                                                                                                                                                                                                                                                                                                                                                                                                                                                                                                                                                                                                                                                           |                  | IV                       |
| 1.                                                           | ¿Lo/a llevaba a "control de niño/a sano/a"?                                                                                  | <input type="checkbox"/> Todos los meses <input type="checkbox"/> A veces<br><input type="checkbox"/> Nunca<br><input type="checkbox"/> Omite <input type="checkbox"/> Ns/Nc                                                                                                                                                                                                                                                                                                                                                                                                                                                                                                              |                  |                          |
| (Si la respuesta es Ns/Nc, Nunca u Omite pasar a Pregunta 6) |                                                                                                                              |                                                                                                                                                                                                                                                                                                                                                                                                                                                                                                                                                                                                                                                                                           |                  |                          |
| 2.                                                           | Lugar donde lo/a llevaba a hacer control:                                                                                    | <input type="checkbox"/> Hospital público <input type="checkbox"/> Centro de salud<br><input type="checkbox"/> Hospital privado <input type="checkbox"/> Obra social<br><input type="checkbox"/> En la casa<br><input type="checkbox"/> Otro: Especificar <input type="text"/><br><input type="checkbox"/> Omite <input type="checkbox"/> Ns/Nc                                                                                                                                                                                                                                                                                                                                           |                  |                          |
| 3.                                                           | En el caso de que asistiera a alguna Institución, escribir cual:                                                             | <input type="text"/>                                                                                                                                                                                                                                                                                                                                                                                                                                                                                                                                                                                                                                                                      |                  |                          |
| 4.                                                           | Fecha de la primera consulta:                                                                                                | <input type="text"/> / <input type="text"/> / <input type="text"/><br><input type="checkbox"/> Omite <input type="checkbox"/> Ns/Nc                                                                                                                                                                                                                                                                                                                                                                                                                                                                                                                                                       |                  |                          |
| 5.                                                           | Fecha de la última consulta:                                                                                                 | <input type="text"/> / <input type="text"/> / <input type="text"/><br><input type="checkbox"/> Omite <input type="checkbox"/> Ns/Nc                                                                                                                                                                                                                                                                                                                                                                                                                                                                                                                                                       |                  |                          |
| 6.                                                           | Si al control de niño/a sano/a lo llevó A veces o Nunca ¿Por qué lo cree posible?<br><br>Marcar todas las opciones posibles. | <input type="checkbox"/> No lo consideró necesario<br><input type="checkbox"/> Obstáculos (temores, expectativas)<br><input type="checkbox"/> No tenía acompañamiento para llevarlo<br><input type="checkbox"/> No tenía con quien dejar a sus otros hijos<br><input type="checkbox"/> Le quedaba muy lejos<br><input type="checkbox"/> No tenía transporte desde el domicilio al servicio de salud<br><input type="checkbox"/> No la atendían en el servicio de salud<br><input type="checkbox"/> No había pediatra en el centro de salud y hospital<br><input type="checkbox"/> Otro: Especificar <input type="text"/><br><input type="checkbox"/> Omite <input type="checkbox"/> Ns/Nc |                  |                          |
| 7.                                                           | ¿Cuál fue el peso conocido del niño antes de fallecer?                                                                       | <input type="text"/> gramos<br><input type="checkbox"/> Omite <input type="checkbox"/> Ns/Nc                                                                                                                                                                                                                                                                                                                                                                                                                                                                                                                                                                                              |                  |                          |
| VACUNAS                                                      |                                                                                                                              |                                                                                                                                                                                                                                                                                                                                                                                                                                                                                                                                                                                                                                                                                           |                  | V                        |
| 1.                                                           | ¿Cómo era el estado del esquema de vacunas para la edad al fallecer, según el calendario nacional?                           | <input type="checkbox"/> Completas <input type="checkbox"/> Incompletas<br><input type="checkbox"/> Omite <input type="checkbox"/> Ns/Nc                                                                                                                                                                                                                                                                                                                                                                                                                                                                                                                                                  |                  |                          |

Identificación del Paciente: \_\_\_\_ - \_\_\_\_ - \_\_\_\_ - \_\_\_\_ - \_\_\_\_

Codificación: dos letras nombre, dos letras apellido y fecha de nacimiento

| FICHA                                                                          |                                                                                                                                                                                                                                                       | MORTALIDAD INFANTIL DOMICILIARIA                                                                                                                                                                                                                                                                                                                                                                                                                                                                                                                                                                                                                                                                                                                                                                                                                                                                                                                                                              |                     |                                   |           |                                                                                                                                                                                                                                                                                                                                                                                                                                                                                                                                    |          | Florencio Varela <input type="checkbox"/><br>Lomas de Zamora <input type="checkbox"/> |       |                |             |
|--------------------------------------------------------------------------------|-------------------------------------------------------------------------------------------------------------------------------------------------------------------------------------------------------------------------------------------------------|-----------------------------------------------------------------------------------------------------------------------------------------------------------------------------------------------------------------------------------------------------------------------------------------------------------------------------------------------------------------------------------------------------------------------------------------------------------------------------------------------------------------------------------------------------------------------------------------------------------------------------------------------------------------------------------------------------------------------------------------------------------------------------------------------------------------------------------------------------------------------------------------------------------------------------------------------------------------------------------------------|---------------------|-----------------------------------|-----------|------------------------------------------------------------------------------------------------------------------------------------------------------------------------------------------------------------------------------------------------------------------------------------------------------------------------------------------------------------------------------------------------------------------------------------------------------------------------------------------------------------------------------------|----------|---------------------------------------------------------------------------------------|-------|----------------|-------------|
|                                                                                |                                                                                                                                                                                                                                                       | Fundación Infant - Versión 2.1 - Octubre 2016                                                                                                                                                                                                                                                                                                                                                                                                                                                                                                                                                                                                                                                                                                                                                                                                                                                                                                                                                 |                     |                                   |           |                                                                                                                                                                                                                                                                                                                                                                                                                                                                                                                                    |          |                                                                                       |       |                |             |
| 2.                                                                             | Si el esquema de vacunación estaba Incompleto para la edad al momento de fallecer ¿Por qué cree que sucedió?<br><br>Marcar todas las opciones posibles                                                                                                | <div style="display: flex; flex-wrap: wrap;"> <div style="width: 50%;"> <input type="checkbox"/> No lo consideró necesario<br/> <input type="checkbox"/> Obstáculos (temores, expectativas)<br/> <input type="checkbox"/> No tenía acompañamiento para llevarlo<br/> <input type="checkbox"/> No tenía con quien dejar a sus otros hijos<br/> <input type="checkbox"/> Le quedaba muy lejos<br/> <input type="checkbox"/> No tenía transporte desde el domicilio al servicio de salud<br/> <input type="checkbox"/> No la atendían en el servicio de salud<br/> <input type="checkbox"/> No vacunaban en el centro de salud donde asistía<br/> <input type="checkbox"/> El/la bebé estaba siempre enfermo/a y por eso me decían que no podía vacunarlo/a<br/> <input type="checkbox"/> Otro: Especificar <input style="width: 100%;" type="text"/> </div> <div style="width: 50%;"> <input type="checkbox"/> Omite <input style="width: 50%;" type="checkbox"/> Ns/Nc           </div> </div> |                     |                                   |           |                                                                                                                                                                                                                                                                                                                                                                                                                                                                                                                                    |          |                                                                                       |       |                |             |
| (Si tiene el carnet de vacunas, marque las vacunas administradas en el ítem 3) |                                                                                                                                                                                                                                                       |                                                                                                                                                                                                                                                                                                                                                                                                                                                                                                                                                                                                                                                                                                                                                                                                                                                                                                                                                                                               |                     |                                   |           |                                                                                                                                                                                                                                                                                                                                                                                                                                                                                                                                    |          |                                                                                       |       |                |             |
| 3.                                                                             | Marque todas las vacunas que tiene documentadas en su carnet<br><div style="display: flex; justify-content: space-between;"> <span>SI tiene el carnet <input type="checkbox"/></span> <span>NO tiene el carnet <input type="checkbox"/></span> </div> |                                                                                                                                                                                                                                                                                                                                                                                                                                                                                                                                                                                                                                                                                                                                                                                                                                                                                                                                                                                               |                     |                                   |           |                                                                                                                                                                                                                                                                                                                                                                                                                                                                                                                                    |          |                                                                                       |       |                |             |
|                                                                                |                                                                                                                                                                                                                                                       | Vacunas                                                                                                                                                                                                                                                                                                                                                                                                                                                                                                                                                                                                                                                                                                                                                                                                                                                                                                                                                                                       |                     |                                   |           |                                                                                                                                                                                                                                                                                                                                                                                                                                                                                                                                    |          |                                                                                       |       |                |             |
| Edad                                                                           | BCG                                                                                                                                                                                                                                                   | Hepatitis B                                                                                                                                                                                                                                                                                                                                                                                                                                                                                                                                                                                                                                                                                                                                                                                                                                                                                                                                                                                   | Neumococo conjugada | Quintuple Pentavalente DTP-HB-Hib | Rotavirus | Cuadruple o Quintuple Pentavalente                                                                                                                                                                                                                                                                                                                                                                                                                                                                                                 | Polio    | Triple Viral SRP                                                                      | Gripe | Hepatitis A HA | Varicela    |
| Recien nacido                                                                  | Unica dosis                                                                                                                                                                                                                                           | Dosis neonatal                                                                                                                                                                                                                                                                                                                                                                                                                                                                                                                                                                                                                                                                                                                                                                                                                                                                                                                                                                                |                     |                                   |           |                                                                                                                                                                                                                                                                                                                                                                                                                                                                                                                                    |          |                                                                                       |       |                |             |
| 2 meses                                                                        |                                                                                                                                                                                                                                                       |                                                                                                                                                                                                                                                                                                                                                                                                                                                                                                                                                                                                                                                                                                                                                                                                                                                                                                                                                                                               | 1º dosis            | 1º dosis                          | 1º dosis  |                                                                                                                                                                                                                                                                                                                                                                                                                                                                                                                                    | 1º dosis |                                                                                       |       |                |             |
| 4 meses                                                                        |                                                                                                                                                                                                                                                       |                                                                                                                                                                                                                                                                                                                                                                                                                                                                                                                                                                                                                                                                                                                                                                                                                                                                                                                                                                                               | 2º dosis            | 2º dosis                          | 2º dosis  |                                                                                                                                                                                                                                                                                                                                                                                                                                                                                                                                    | 2º dosis |                                                                                       |       |                |             |
| 6 meses                                                                        |                                                                                                                                                                                                                                                       |                                                                                                                                                                                                                                                                                                                                                                                                                                                                                                                                                                                                                                                                                                                                                                                                                                                                                                                                                                                               |                     | 3º dosis                          |           |                                                                                                                                                                                                                                                                                                                                                                                                                                                                                                                                    | 3º dosis |                                                                                       |       |                |             |
| 12 meses                                                                       |                                                                                                                                                                                                                                                       |                                                                                                                                                                                                                                                                                                                                                                                                                                                                                                                                                                                                                                                                                                                                                                                                                                                                                                                                                                                               | refuerzo            |                                   |           |                                                                                                                                                                                                                                                                                                                                                                                                                                                                                                                                    |          | 1º refuerzo                                                                           |       | unica dosis    |             |
| 15 meses                                                                       |                                                                                                                                                                                                                                                       |                                                                                                                                                                                                                                                                                                                                                                                                                                                                                                                                                                                                                                                                                                                                                                                                                                                                                                                                                                                               |                     |                                   |           |                                                                                                                                                                                                                                                                                                                                                                                                                                                                                                                                    |          |                                                                                       |       |                | unica dosis |
| 15-18 meses                                                                    |                                                                                                                                                                                                                                                       |                                                                                                                                                                                                                                                                                                                                                                                                                                                                                                                                                                                                                                                                                                                                                                                                                                                                                                                                                                                               |                     |                                   |           | 1º refuerzo                                                                                                                                                                                                                                                                                                                                                                                                                                                                                                                        |          |                                                                                       |       |                |             |
| 18 meses                                                                       |                                                                                                                                                                                                                                                       |                                                                                                                                                                                                                                                                                                                                                                                                                                                                                                                                                                                                                                                                                                                                                                                                                                                                                                                                                                                               |                     |                                   |           |                                                                                                                                                                                                                                                                                                                                                                                                                                                                                                                                    |          |                                                                                       |       |                |             |
| 24 meses                                                                       |                                                                                                                                                                                                                                                       |                                                                                                                                                                                                                                                                                                                                                                                                                                                                                                                                                                                                                                                                                                                                                                                                                                                                                                                                                                                               |                     |                                   |           |                                                                                                                                                                                                                                                                                                                                                                                                                                                                                                                                    |          |                                                                                       |       |                |             |
| ANTECEDENTES DE ENFERMEDAD DE EL/LA NIÑO/A                                     |                                                                                                                                                                                                                                                       |                                                                                                                                                                                                                                                                                                                                                                                                                                                                                                                                                                                                                                                                                                                                                                                                                                                                                                                                                                                               |                     |                                   |           |                                                                                                                                                                                                                                                                                                                                                                                                                                                                                                                                    |          |                                                                                       |       |                |             |
| VI                                                                             |                                                                                                                                                                                                                                                       |                                                                                                                                                                                                                                                                                                                                                                                                                                                                                                                                                                                                                                                                                                                                                                                                                                                                                                                                                                                               |                     |                                   |           |                                                                                                                                                                                                                                                                                                                                                                                                                                                                                                                                    |          |                                                                                       |       |                |             |
| 1.                                                                             | ¿Presentó alguna de estas enfermedades agudas en su vida?<br><br>Marcar todas las que tuvo.                                                                                                                                                           |                                                                                                                                                                                                                                                                                                                                                                                                                                                                                                                                                                                                                                                                                                                                                                                                                                                                                                                                                                                               |                     |                                   |           | <div style="display: flex; flex-wrap: wrap;"> <div style="width: 50%;"> <input type="checkbox"/> Ninguna<br/> <input type="checkbox"/> Bronquiolitis<br/> <input type="checkbox"/> Otro: Especificar <input style="width: 100%;" type="text"/><br/> <input type="checkbox"/> Omite           </div> <div style="width: 50%;"> <input type="checkbox"/> Neumonía<br/> <input type="checkbox"/> Otitis media aguda<br/> <input type="checkbox"/> Ns/Nc           </div> </div>                                                       |          |                                                                                       |       |                |             |
| 2.                                                                             | ¿Presentó alguna vez estos eventos?<br><br>Marcar todas las que tuvo.                                                                                                                                                                                 |                                                                                                                                                                                                                                                                                                                                                                                                                                                                                                                                                                                                                                                                                                                                                                                                                                                                                                                                                                                               |                     |                                   |           | <div style="display: flex; flex-wrap: wrap;"> <div style="width: 50%;"> <input type="checkbox"/> Caída de altura<br/> <input type="checkbox"/> Quemadura<br/> <input type="checkbox"/> Otro: Especificar <input style="width: 100%;" type="text"/><br/> <input type="checkbox"/> Omite           </div> <div style="width: 50%;"> <input type="checkbox"/> Fractura<br/> <input type="checkbox"/> Moretones en la piel<br/> <input type="checkbox"/> Ns/Nc <input style="width: 50%;" type="checkbox"/> No           </div> </div> |          |                                                                                       |       |                |             |

Identificación del Paciente: \_\_\_\_ - \_\_\_\_ - \_\_\_\_ - \_\_\_\_ - \_\_\_\_

| FICHA                                                         |                                                                                                                                                  | MORTALIDAD INFANTIL DOMICILIARIA<br>Fundación Infant - Versión 2.1 - Octubre 2016                                                                                                                                                                                                                                                                                                                                                                                                                                                                                                                                                                                                                                                                                                                                                                                                                                                   |  | Florencio Varela <input type="checkbox"/><br>Lomas de Zamora <input type="checkbox"/> |  |
|---------------------------------------------------------------|--------------------------------------------------------------------------------------------------------------------------------------------------|-------------------------------------------------------------------------------------------------------------------------------------------------------------------------------------------------------------------------------------------------------------------------------------------------------------------------------------------------------------------------------------------------------------------------------------------------------------------------------------------------------------------------------------------------------------------------------------------------------------------------------------------------------------------------------------------------------------------------------------------------------------------------------------------------------------------------------------------------------------------------------------------------------------------------------------|--|---------------------------------------------------------------------------------------|--|
| 3.                                                            | ¿El/la niño/a requirió internación/es? (excluyendo neonatología).                                                                                | <input type="checkbox"/> Si, especificar ↓<br><div style="border: 1px solid black; height: 40px; width: 100%;"></div> <input type="checkbox"/> No<br><input type="checkbox"/> Omite <input type="checkbox"/> Ns/Nc                                                                                                                                                                                                                                                                                                                                                                                                                                                                                                                                                                                                                                                                                                                  |  |                                                                                       |  |
| 4.                                                            | Marcar si presentaba alguna de las siguientes enfermedades (Comorbilidades) y enfermedades crónicas<br><br>Marcar o escribir todas las que tuvo. | <input type="checkbox"/> Atopia (rinitis alérgica, dermatitis atópica, eccema)<br><input type="checkbox"/> Enfermedad respiratoria crónica<br><input type="checkbox"/> Cardiopatía congénita<br><input type="checkbox"/> Síndrome de Down<br><input type="checkbox"/> Otro síndrome → <div style="border: 1px solid black; width: 150px; height: 20px;"></div><br><input type="checkbox"/> Inmunodeficiencia<br><div style="border: 1px solid black; width: 150px; height: 20px;"></div><br><input type="checkbox"/> Otra patología → <div style="border: 1px solid black; width: 150px; height: 20px;"></div><br><input type="checkbox"/> Omite <input type="checkbox"/> Ns/Nc <input type="checkbox"/> No                                                                                                                                                                                                                         |  |                                                                                       |  |
| ANTECEDENTES MATERNOS <span style="float: right;">C</span>    |                                                                                                                                                  |                                                                                                                                                                                                                                                                                                                                                                                                                                                                                                                                                                                                                                                                                                                                                                                                                                                                                                                                     |  |                                                                                       |  |
| ANTECEDENTES DE LA MADRE <span style="float: right;">I</span> |                                                                                                                                                  |                                                                                                                                                                                                                                                                                                                                                                                                                                                                                                                                                                                                                                                                                                                                                                                                                                                                                                                                     |  |                                                                                       |  |
| 1.                                                            | ¿La mamá de el/la niño/a fallecido/a vive?                                                                                                       | <input type="checkbox"/> Si <input type="checkbox"/> No<br><input type="checkbox"/> Omite <input type="checkbox"/> Ns/Nc                                                                                                                                                                                                                                                                                                                                                                                                                                                                                                                                                                                                                                                                                                                                                                                                            |  |                                                                                       |  |
| 2.                                                            | ¿Vivía la mamá junto con su hijo/a antes de fallecer el/la niño/a?                                                                               | <input type="checkbox"/> Si <input type="checkbox"/> No<br><input type="checkbox"/> Omite <input type="checkbox"/> Ns/Nc                                                                                                                                                                                                                                                                                                                                                                                                                                                                                                                                                                                                                                                                                                                                                                                                            |  |                                                                                       |  |
| 3.                                                            | ¿Cuál es la fecha de nacimiento de la madre?                                                                                                     | <div style="display: flex; align-items: center;"> <div style="border: 1px solid black; width: 20px; height: 20px; margin-right: 5px;"></div> <div style="border: 1px solid black; width: 20px; height: 20px; margin-right: 5px;"></div> <div style="margin: 0 5px;">/</div> <div style="border: 1px solid black; width: 20px; height: 20px; margin-right: 5px;"></div> <div style="border: 1px solid black; width: 20px; height: 20px; margin-right: 5px;"></div> <div style="margin: 0 5px;">/</div> <div style="border: 1px solid black; width: 20px; height: 20px; margin-right: 5px;"></div> <div style="border: 1px solid black; width: 20px; height: 20px; margin-right: 5px;"></div> <div style="border: 1px solid black; width: 20px; height: 20px; margin-right: 5px;"></div> <div style="border: 1px solid black; width: 20px; height: 20px;"></div> </div> <input type="checkbox"/> Omite <input type="checkbox"/> Ns/Nc |  |                                                                                       |  |
| 4.                                                            | ¿Donde nació la madre?                                                                                                                           | Ciudad: <div style="border: 1px solid black; width: 150px; height: 20px;"></div><br>País: <div style="border: 1px solid black; width: 150px; height: 20px;"></div><br><input type="checkbox"/> Omite <input type="checkbox"/> Ns/Nc                                                                                                                                                                                                                                                                                                                                                                                                                                                                                                                                                                                                                                                                                                 |  |                                                                                       |  |
| 5.                                                            | ¿Cuál es el mayor nivel educativo alcanzado por la madre?                                                                                        | <input type="checkbox"/> Primaria incompleta<br><input type="checkbox"/> Primaria completa<br><input type="checkbox"/> Secundaria incompleta (En curso)<br><input type="checkbox"/> Secundaria incompleta (Abandonó)<br><input type="checkbox"/> Secundaria completa<br><input type="checkbox"/> Terciario/Universitario incompleto<br><input type="checkbox"/> Terciario/Universitario completo<br><input type="checkbox"/> Omite <input type="checkbox"/> Ns/Nc                                                                                                                                                                                                                                                                                                                                                                                                                                                                   |  |                                                                                       |  |

Identificación del Paciente: \_\_\_\_ - \_\_\_\_ - \_\_\_\_ - \_\_\_\_ - \_\_\_\_

| FICHA                                                                               |                                                                                                        | MORTALIDAD INFANTIL DOMICILIARIA<br>Fundación Infant - Versión 2.1 - Octubre 2016                                                                                                                                                                                                                                                                    |  | Florencio Varela <input type="checkbox"/><br>Lomas de Zamora <input type="checkbox"/> |  |
|-------------------------------------------------------------------------------------|--------------------------------------------------------------------------------------------------------|------------------------------------------------------------------------------------------------------------------------------------------------------------------------------------------------------------------------------------------------------------------------------------------------------------------------------------------------------|--|---------------------------------------------------------------------------------------|--|
| 6.                                                                                  | ¿El padre la acompañó durante el embarazo?                                                             | <input type="checkbox"/> Si <input type="checkbox"/> No<br><input type="checkbox"/> Omite <input type="checkbox"/> Ns/Nc                                                                                                                                                                                                                             |  |                                                                                       |  |
| 7.                                                                                  | Desde que nació el/la niño/a, ¿Cómo fue la relación con el padre del niño?                             | <input type="checkbox"/> Casados/pareja estable<br><input type="checkbox"/> Separados con contacto frecuente<br><input type="checkbox"/> Separados sin contacto<br><input type="checkbox"/> Contacto conflictivo<br><input type="checkbox"/> Otro: Especificar <input type="text"/><br><input type="checkbox"/> Omite <input type="checkbox"/> Ns/Nc |  |                                                                                       |  |
| 8.                                                                                  | ¿Donde vive la madre?                                                                                  | Barrio: <input type="text"/><br><input type="checkbox"/> Omite <input type="checkbox"/> Ns/Nc                                                                                                                                                                                                                                                        |  |                                                                                       |  |
| 9.                                                                                  | ¿Hace cuánto vive allí? (Marcar el tiempo correcto)                                                    | Cantidad de <input type="text"/> <input type="text"/> Meses <input type="text"/> <input type="text"/> Años<br><input type="checkbox"/> Omite <input type="checkbox"/> Ns/Nc                                                                                                                                                                          |  |                                                                                       |  |
| 10.                                                                                 | ¿Su vivienda anterior, era en este mismo barrio?                                                       | <input type="checkbox"/> Si <input type="checkbox"/> No<br><input type="checkbox"/> Omite <input type="checkbox"/> Ns/Nc                                                                                                                                                                                                                             |  |                                                                                       |  |
| 11.                                                                                 | ¿Cuántas veces cambio su vivienda en los últimos tres años?                                            | <input type="checkbox"/> 0 <input type="checkbox"/> 1 <input type="checkbox"/> 2 <input type="checkbox"/> 3<br><input type="checkbox"/> más de 3 veces<br><input type="checkbox"/> Omite <input type="checkbox"/> Ns/Nc                                                                                                                              |  |                                                                                       |  |
| <b>ANTECEDENTES RESPIRATORIOS MATERNOS</b> <span style="float: right;">II</span>    |                                                                                                        |                                                                                                                                                                                                                                                                                                                                                      |  |                                                                                       |  |
| 1.                                                                                  | ¿Le ha diagnosticado a la madre asma o broncoespasmo un médico?                                        | <input type="checkbox"/> Si <input type="checkbox"/> No<br><input type="checkbox"/> Omite <input type="checkbox"/> Ns/Nc                                                                                                                                                                                                                             |  |                                                                                       |  |
| 2.                                                                                  | ¿Presenta la madre rinitis alérgica u otra manifestación de alergia (en la piel, alergia a alimentos)? | <input type="checkbox"/> Si <input type="checkbox"/> No<br><input type="checkbox"/> Omite <input type="checkbox"/> Ns/Nc                                                                                                                                                                                                                             |  |                                                                                       |  |
| <b>ANTECEDENTES PERINATOLÓGICOS MATERNOS</b> <span style="float: right;">III</span> |                                                                                                        |                                                                                                                                                                                                                                                                                                                                                      |  |                                                                                       |  |
| 1.                                                                                  | ¿Cuántos embarazos tuvo la mamá en total?                                                              | <input type="text"/> <input type="text"/><br><input type="checkbox"/> Omite <input type="checkbox"/> Ns/Nc                                                                                                                                                                                                                                           |  |                                                                                       |  |
| 2.                                                                                  | ¿Cuántos partos tuvo la mamá?                                                                          | <input type="text"/> <input type="text"/><br><input type="checkbox"/> Omite <input type="checkbox"/> Ns/Nc                                                                                                                                                                                                                                           |  |                                                                                       |  |
| 3.                                                                                  | Cantidad de hijos vivos que tiene                                                                      | <input type="text"/> <input type="text"/><br><input type="checkbox"/> Omite <input type="checkbox"/> Ns/Nc                                                                                                                                                                                                                                           |  |                                                                                       |  |

Identificación del Paciente: \_\_\_\_ - \_\_\_\_ - \_\_\_\_ - \_\_\_\_ - \_\_\_\_

Codificación: dos letras nombre, dos letras apellido y fecha de nacimiento

| FICHA                                              |                                                                                                            | MORTALIDAD INFANTIL DOMICILIARIA<br>Fundación Infant - Versión 2.1 - Octubre 2016                                                                                                                                                                                                                                                                                                                                                                                                                                                                                                                                                                                          |                          | Florencio Varela <input type="checkbox"/><br>Lomas de Zamora <input type="checkbox"/> |  |        |    |    |       |                  |            |                          |                          |                          |                      |                   |                          |                          |                          |                      |             |                          |                          |                          |                      |
|----------------------------------------------------|------------------------------------------------------------------------------------------------------------|----------------------------------------------------------------------------------------------------------------------------------------------------------------------------------------------------------------------------------------------------------------------------------------------------------------------------------------------------------------------------------------------------------------------------------------------------------------------------------------------------------------------------------------------------------------------------------------------------------------------------------------------------------------------------|--------------------------|---------------------------------------------------------------------------------------|--|--------|----|----|-------|------------------|------------|--------------------------|--------------------------|--------------------------|----------------------|-------------------|--------------------------|--------------------------|--------------------------|----------------------|-------------|--------------------------|--------------------------|--------------------------|----------------------|
| 4.                                                 | ¿Cuántos abortos tuvo la mama?                                                                             | <input type="text"/> <input type="text"/><br><input type="checkbox"/> Omite <input type="checkbox"/> Ns/Nc                                                                                                                                                                                                                                                                                                                                                                                                                                                                                                                                                                 |                          |                                                                                       |  |        |    |    |       |                  |            |                          |                          |                          |                      |                   |                          |                          |                          |                      |             |                          |                          |                          |                      |
| 5.                                                 | ¿Cuántos hijos fallecido tiene la mama?                                                                    | <input type="text"/> <input type="text"/><br><input type="checkbox"/> Omite <input type="checkbox"/> Ns/Nc                                                                                                                                                                                                                                                                                                                                                                                                                                                                                                                                                                 |                          |                                                                                       |  |        |    |    |       |                  |            |                          |                          |                          |                      |                   |                          |                          |                          |                      |             |                          |                          |                          |                      |
| 6.                                                 | ¿Tiene hijos que nacieron antes de tiempo?                                                                 | <input type="checkbox"/> Si → Cuántos? <input type="text"/> <input type="text"/><br>Cuándo? <input type="text"/><br><input type="checkbox"/> No<br><input type="checkbox"/> Omite <input type="checkbox"/> Ns/Nc                                                                                                                                                                                                                                                                                                                                                                                                                                                           |                          |                                                                                       |  |        |    |    |       |                  |            |                          |                          |                          |                      |                   |                          |                          |                          |                      |             |                          |                          |                          |                      |
| 7.                                                 | ¿Tiene hijos que nacieron con peso menor a 2500 gramos?                                                    | <input type="checkbox"/> Si → Cuántos? <input type="text"/> <input type="text"/><br><input type="checkbox"/> No<br><input type="checkbox"/> Omite <input type="checkbox"/> Ns/Nc                                                                                                                                                                                                                                                                                                                                                                                                                                                                                           |                          |                                                                                       |  |        |    |    |       |                  |            |                          |                          |                          |                      |                   |                          |                          |                          |                      |             |                          |                          |                          |                      |
| 8.                                                 | Vacunas que la mamá recibió durante el embarazo, completar según la documentación del control del embarazo | <table border="1"> <thead> <tr> <th>Vacuna</th> <th>Si</th> <th>No</th> <th>Ns/Nc</th> <th>Fecha aplicación</th> </tr> </thead> <tbody> <tr> <td>Antigripal</td> <td><input type="checkbox"/></td> <td><input type="checkbox"/></td> <td><input type="checkbox"/></td> <td><input type="text"/></td> </tr> <tr> <td>V.Acelular (DPaT)</td> <td><input type="checkbox"/></td> <td><input type="checkbox"/></td> <td><input type="checkbox"/></td> <td><input type="text"/></td> </tr> <tr> <td>Doble (DPT)</td> <td><input type="checkbox"/></td> <td><input type="checkbox"/></td> <td><input type="checkbox"/></td> <td><input type="text"/></td> </tr> </tbody> </table> |                          |                                                                                       |  | Vacuna | Si | No | Ns/Nc | Fecha aplicación | Antigripal | <input type="checkbox"/> | <input type="checkbox"/> | <input type="checkbox"/> | <input type="text"/> | V.Acelular (DPaT) | <input type="checkbox"/> | <input type="checkbox"/> | <input type="checkbox"/> | <input type="text"/> | Doble (DPT) | <input type="checkbox"/> | <input type="checkbox"/> | <input type="checkbox"/> | <input type="text"/> |
| Vacuna                                             | Si                                                                                                         | No                                                                                                                                                                                                                                                                                                                                                                                                                                                                                                                                                                                                                                                                         | Ns/Nc                    | Fecha aplicación                                                                      |  |        |    |    |       |                  |            |                          |                          |                          |                      |                   |                          |                          |                          |                      |             |                          |                          |                          |                      |
| Antigripal                                         | <input type="checkbox"/>                                                                                   | <input type="checkbox"/>                                                                                                                                                                                                                                                                                                                                                                                                                                                                                                                                                                                                                                                   | <input type="checkbox"/> | <input type="text"/>                                                                  |  |        |    |    |       |                  |            |                          |                          |                          |                      |                   |                          |                          |                          |                      |             |                          |                          |                          |                      |
| V.Acelular (DPaT)                                  | <input type="checkbox"/>                                                                                   | <input type="checkbox"/>                                                                                                                                                                                                                                                                                                                                                                                                                                                                                                                                                                                                                                                   | <input type="checkbox"/> | <input type="text"/>                                                                  |  |        |    |    |       |                  |            |                          |                          |                          |                      |                   |                          |                          |                          |                      |             |                          |                          |                          |                      |
| Doble (DPT)                                        | <input type="checkbox"/>                                                                                   | <input type="checkbox"/>                                                                                                                                                                                                                                                                                                                                                                                                                                                                                                                                                                                                                                                   | <input type="checkbox"/> | <input type="text"/>                                                                  |  |        |    |    |       |                  |            |                          |                          |                          |                      |                   |                          |                          |                          |                      |             |                          |                          |                          |                      |
| 9.                                                 | ¿Tuvo alguna enfermedad o complicación durante el embarazo?                                                | <input type="checkbox"/> Si, cuáles → <div style="display: flex; flex-direction: column; align-items: flex-start;"> <input type="checkbox"/> Fiebre<br/> <input type="checkbox"/> Presión alta<br/> <input type="checkbox"/> Azúcar alta/diabetes<br/> <input type="checkbox"/> Anemia<br/> <input type="checkbox"/> Otro ↓<br/> <input type="text"/> </div> <input type="checkbox"/> No<br><input type="checkbox"/> Omite <input type="checkbox"/> Ns/Nc                                                                                                                                                                                                                  |                          |                                                                                       |  |        |    |    |       |                  |            |                          |                          |                          |                      |                   |                          |                          |                          |                      |             |                          |                          |                          |                      |
| 10.                                                | ¿Cuántas veces durante el embarazo la madre consultó para control del embarazo de el/la niño/a?            | <input type="checkbox"/> Nunca<br><input type="checkbox"/> Menos de 1 vez por trimestre<br><input type="checkbox"/> 1 vez o más por trimestre pero menos de 1 vez por mes<br><input type="checkbox"/> 1 vez por mes o más<br><input type="checkbox"/> Omite <input type="checkbox"/> Ns/Nc                                                                                                                                                                                                                                                                                                                                                                                 |                          |                                                                                       |  |        |    |    |       |                  |            |                          |                          |                          |                      |                   |                          |                          |                          |                      |             |                          |                          |                          |                      |
| (si contesta Nunca, NS/Nc, Omite pasar a Preg. 15) |                                                                                                            |                                                                                                                                                                                                                                                                                                                                                                                                                                                                                                                                                                                                                                                                            |                          |                                                                                       |  |        |    |    |       |                  |            |                          |                          |                          |                      |                   |                          |                          |                          |                      |             |                          |                          |                          |                      |

Identificación del Paciente: \_\_\_\_ - \_\_\_\_ - \_\_\_\_ - \_\_\_\_ - \_\_\_\_

Codificación: dos letras nombre, dos letras apellido y fecha de nacimiento

| FICHA |                                                                                                                                              | MORTALIDAD INFANTIL DOMICILIARIA<br>Fundación Infant - Versión 2.1 - Octubre 2016                                                                                                                                                                                                                                                                                                                                                                                                                                                                                                                                                                                      |  | Florencio Varela <input type="checkbox"/><br>Lomas de Zamora <input type="checkbox"/> |  |
|-------|----------------------------------------------------------------------------------------------------------------------------------------------|------------------------------------------------------------------------------------------------------------------------------------------------------------------------------------------------------------------------------------------------------------------------------------------------------------------------------------------------------------------------------------------------------------------------------------------------------------------------------------------------------------------------------------------------------------------------------------------------------------------------------------------------------------------------|--|---------------------------------------------------------------------------------------|--|
| 11.   | ¿En qué consistió el control?                                                                                                                | <input type="checkbox"/> Control médico y ecográfico<br><input type="checkbox"/> Control sólo médico<br><input type="checkbox"/> Control sólo ecográfico<br><input type="checkbox"/> Omite <input type="checkbox"/> Ns/Nc                                                                                                                                                                                                                                                                                                                                                                                                                                              |  |                                                                                       |  |
| 12.   | ¿Dónde realizó los controles durante el embarazo?<br>Marcar todas las opciones posibles.                                                     | <input type="checkbox"/> Hospital público <input type="checkbox"/> Centro de salud<br><input type="checkbox"/> Hospital privado <input type="checkbox"/> Obra social<br><input type="checkbox"/> En la casa<br><input type="checkbox"/> Otro: Especificar <input type="text"/><br><input type="checkbox"/> Omite <input type="checkbox"/> Ns/Nc                                                                                                                                                                                                                                                                                                                        |  |                                                                                       |  |
| 13.   | En caso de haber nacido en una institución, escribir el nombre:                                                                              | <input type="text"/>                                                                                                                                                                                                                                                                                                                                                                                                                                                                                                                                                                                                                                                   |  |                                                                                       |  |
| 14.   | ¿Quién le realizó los controles del embarazo?<br>Marcar todas las opciones posibles.                                                         | <input type="checkbox"/> Medico <input type="checkbox"/> Partera<br><input type="checkbox"/> Enfermera<br><input type="checkbox"/> Otro: Especificar <input type="text"/><br><input type="checkbox"/> Omite <input type="checkbox"/> Ns/Nc                                                                                                                                                                                                                                                                                                                                                                                                                             |  |                                                                                       |  |
| 15.   | Si no controló el embarazo, o fue menos de una vez por trimestre, ¿cuál cree que fueron los motivos?<br>Marcar todas las opciones posibles   | <input type="checkbox"/> No lo consideró necesario<br><input type="checkbox"/> Obstáculos (temores, expectativas)<br><input type="checkbox"/> No tenía acompañamiento para llevarlo<br><input type="checkbox"/> No tenía con quien dejar a sus otros hijos<br><input type="checkbox"/> Le quedaba muy lejos<br><input type="checkbox"/> No tenía transporte desde el domicilio al servicio de salud<br><input type="checkbox"/> No la atendían en el servicio de salud<br><input type="checkbox"/> No sabía que estaba embarazada<br><input type="checkbox"/> Otro : Especificar <input type="text"/><br><input type="checkbox"/> Omite <input type="checkbox"/> Ns/Nc |  |                                                                                       |  |
| 16.   | Durante el embarazo, en alguna institución de salud o centro comunitario ¿le contaron acerca del embarazo, cuidados del recién nacido, etc.? | <input type="checkbox"/> Si <input type="checkbox"/> No<br><input type="checkbox"/> Omite <input type="checkbox"/> Ns/Nc                                                                                                                                                                                                                                                                                                                                                                                                                                                                                                                                               |  |                                                                                       |  |
| 17.   | ¿Sintió que tuvo dónde acudir para preguntar acerca de estos temas?                                                                          | <input type="checkbox"/> Si <input type="checkbox"/> No<br><input type="checkbox"/> Omite <input type="checkbox"/> Ns/Nc                                                                                                                                                                                                                                                                                                                                                                                                                                                                                                                                               |  |                                                                                       |  |

Identificación del Paciente: \_\_\_\_ - \_\_\_\_ - \_\_\_\_ - \_\_\_\_ - \_\_\_\_

| FICHA                                                                   |                                                                                              | MORTALIDAD INFANTIL DOMICILIARIA<br>Fundación Infant - Versión 2.1 - Octubre 2016                                                                                                                                                                                                                                                                                                                                                              |                                                               | Florencio Varela <input type="checkbox"/><br>Lomas de Zamora <input type="checkbox"/> |           |
|-------------------------------------------------------------------------|----------------------------------------------------------------------------------------------|------------------------------------------------------------------------------------------------------------------------------------------------------------------------------------------------------------------------------------------------------------------------------------------------------------------------------------------------------------------------------------------------------------------------------------------------|---------------------------------------------------------------|---------------------------------------------------------------------------------------|-----------|
| 18.                                                                     | ¿Trabajó y/o estudió durante el embarazo?                                                    | <input type="checkbox"/> Si<br><input type="checkbox"/> Omite                                                                                                                                                                                                                                                                                                                                                                                  | <input type="checkbox"/> No<br><input type="checkbox"/> Ns/Nc |                                                                                       |           |
| (si es NO, Omite, Ns/Nc pasar a " Hábitos durante el embarazo" )        |                                                                                              |                                                                                                                                                                                                                                                                                                                                                                                                                                                |                                                               |                                                                                       |           |
| 19.                                                                     | ¿Que actividad desarrollaba?                                                                 | <input type="checkbox"/> Empleada (administrativa / en comercio)<br><input type="checkbox"/> Fábrica (operaria)<br><input type="checkbox"/> Doméstica / portería<br><input type="checkbox"/> Taller de costura<br><input type="checkbox"/> Jubilada<br><input type="checkbox"/> Desocupada (busca trabajo)<br><input type="checkbox"/> Otro: Especificar <input type="text"/><br><input type="checkbox"/> Omite <input type="checkbox"/> Ns/Nc |                                                               |                                                                                       |           |
| 20.                                                                     | ¿Hasta que mes del embarazo trabajaba y /o estudiaba ?                                       | <input type="checkbox"/> mes<br><input type="checkbox"/> Omite                                                                                                                                                                                                                                                                                                                                                                                 | <input type="checkbox"/> Ns/Nc                                |                                                                                       |           |
| 21.                                                                     | ¿Cuántos días por semana trabajada y/o estudiaba?                                            | <input type="checkbox"/> días<br><input type="checkbox"/> Omite                                                                                                                                                                                                                                                                                                                                                                                | <input type="checkbox"/> Ns/Nc                                |                                                                                       |           |
| 22.                                                                     | ¿Cuántas horas por día trabajaba y/o estudiaba ?                                             | <input type="text"/> <input type="text"/> horas<br><input type="checkbox"/> Omite                                                                                                                                                                                                                                                                                                                                                              | <input type="checkbox"/> Ns/Nc                                |                                                                                       |           |
| <b>HÁBITOS DURANTE EL EMBARAZO</b>                                      |                                                                                              |                                                                                                                                                                                                                                                                                                                                                                                                                                                |                                                               |                                                                                       | <b>IV</b> |
| 1.                                                                      | ¿Fumó tabaco durante el embarazo?                                                            | <input type="checkbox"/> Si<br><input type="checkbox"/> Omite                                                                                                                                                                                                                                                                                                                                                                                  | <input type="checkbox"/> No<br><input type="checkbox"/> Ns/Nc |                                                                                       |           |
| (Si no fumó tabaco durante el embarazo, Ns/Nc u Omite, pasar al ítem 3) |                                                                                              |                                                                                                                                                                                                                                                                                                                                                                                                                                                |                                                               |                                                                                       |           |
| 2.                                                                      | ¿Durante que trimestre/s?                                                                    | <input type="checkbox"/> 1° trimestre<br><input type="checkbox"/> 2° trimestre<br><input type="checkbox"/> 3° trimestre<br><input type="checkbox"/> Omite <input type="checkbox"/> Ns/Nc                                                                                                                                                                                                                                                       |                                                               |                                                                                       |           |
| 3.                                                                      | ¿Consumió otras sustancias durante el embarazo? (incluye marihuana, alcohol, y otras drogas) | <input type="checkbox"/> Si<br><input type="checkbox"/> Omite                                                                                                                                                                                                                                                                                                                                                                                  | <input type="checkbox"/> No<br><input type="checkbox"/> Ns/Nc |                                                                                       |           |
| (Si contesta No, Ns/Nc u omite pasar a la pregunta 6 )                  |                                                                                              |                                                                                                                                                                                                                                                                                                                                                                                                                                                |                                                               |                                                                                       |           |
| 4.                                                                      | Especificar que otras sustancias consumió durante el embarazo                                | <input type="text"/>                                                                                                                                                                                                                                                                                                                                                                                                                           |                                                               |                                                                                       |           |

Identificación del Paciente: \_\_\_\_ - \_\_\_\_ - \_\_\_\_ - \_\_\_\_ - \_\_\_\_

| FICHA                                                              |                                                                    | MORTALIDAD INFANTIL DOMICILIARIA<br>Fundación Infant - Versión 2.1 - Octubre 2016                                                                                                                                                                                                                                                                                                                                                                                 |  | Florencio Varela <input type="checkbox"/><br>Lomas de Zamora <input type="checkbox"/> |  |
|--------------------------------------------------------------------|--------------------------------------------------------------------|-------------------------------------------------------------------------------------------------------------------------------------------------------------------------------------------------------------------------------------------------------------------------------------------------------------------------------------------------------------------------------------------------------------------------------------------------------------------|--|---------------------------------------------------------------------------------------|--|
| 5.                                                                 | ¿Durante que trimestre/s?                                          | <input type="checkbox"/> 1° trimestre<br><input type="checkbox"/> 2° trimestre<br><input type="checkbox"/> 3° trimestre<br><input type="checkbox"/> Omite <input type="checkbox"/> Ns/Nc                                                                                                                                                                                                                                                                          |  |                                                                                       |  |
| 6.                                                                 | ¿Consumió algún medicamento durante el embarazo?                   | <input type="checkbox"/> Si <input type="checkbox"/> No<br><input type="checkbox"/> Omite <input type="checkbox"/> Ns/Nc                                                                                                                                                                                                                                                                                                                                          |  |                                                                                       |  |
| (Si contesta No, Ns/Nc u omite pasar a " Antecedentes Paternos" )  |                                                                    |                                                                                                                                                                                                                                                                                                                                                                                                                                                                   |  |                                                                                       |  |
| 7.                                                                 | Especificar que medicamentos consumió durante el embarazo          | <input type="text"/>                                                                                                                                                                                                                                                                                                                                                                                                                                              |  |                                                                                       |  |
| 8.                                                                 | ¿Durante que trimestre/s?                                          | <input type="checkbox"/> 1° trimestre<br><input type="checkbox"/> 2° trimestre<br><input type="checkbox"/> 3° trimestre<br><input type="checkbox"/> Omite <input type="checkbox"/> Ns/Nc                                                                                                                                                                                                                                                                          |  |                                                                                       |  |
| <b>ANTECEDENTES PATERNOS</b> <span style="float: right;">D</span>  |                                                                    |                                                                                                                                                                                                                                                                                                                                                                                                                                                                   |  |                                                                                       |  |
| <b>ANTECEDENTES DEL PADRE</b> <span style="float: right;">I</span> |                                                                    |                                                                                                                                                                                                                                                                                                                                                                                                                                                                   |  |                                                                                       |  |
| 1.                                                                 | ¿El padre de el/la niño/a fallecido/a vive?                        | <input type="checkbox"/> Si <input type="checkbox"/> No<br><input type="checkbox"/> Omite <input type="checkbox"/> Ns/Nc                                                                                                                                                                                                                                                                                                                                          |  |                                                                                       |  |
| 2.                                                                 | ¿Vivía el papá junto con su hijo/a antes de fallecer el/la niño/a? | <input type="checkbox"/> Si <input type="checkbox"/> No<br><input type="checkbox"/> Omite <input type="checkbox"/> Ns/Nc                                                                                                                                                                                                                                                                                                                                          |  |                                                                                       |  |
| 3.                                                                 | ¿Cuál es la fecha de nacimiento del padre?                         | <input type="text"/> / <input type="text"/> / <input type="text"/><br><input type="checkbox"/> Omite <input type="checkbox"/> Ns/Nc                                                                                                                                                                                                                                                                                                                               |  |                                                                                       |  |
| 4.                                                                 | ¿Donde nació el padre?                                             | Ciudad: <input type="text"/><br>País: <input type="text"/><br><input type="checkbox"/> Omite <input type="checkbox"/> Ns/Nc                                                                                                                                                                                                                                                                                                                                       |  |                                                                                       |  |
| 5.                                                                 | ¿Cuál es el mayor nivel educativo alcanzado por el padre?          | <input type="checkbox"/> Primaria incompleta<br><input type="checkbox"/> Primaria completa<br><input type="checkbox"/> Secundaria incompleta (En curso)<br><input type="checkbox"/> Secundaria incompleta (Abandonó)<br><input type="checkbox"/> Secundaria completa<br><input type="checkbox"/> Terciario/Universitario incompleto<br><input type="checkbox"/> Terciario/Universitario completo<br><input type="checkbox"/> Omite <input type="checkbox"/> Ns/Nc |  |                                                                                       |  |

Identificación del Paciente: \_\_\_\_ - \_\_\_\_ - \_\_\_\_ - \_\_\_\_ - \_\_\_\_

|                                                                                     |                                                                                                                                    |                                                             |                                                |                                           |  |
|-------------------------------------------------------------------------------------|------------------------------------------------------------------------------------------------------------------------------------|-------------------------------------------------------------|------------------------------------------------|-------------------------------------------|--|
| <b>FICHA</b>                                                                        |                                                                                                                                    | <b>MORTALIDAD INFANTIL DOMICILIARIA</b>                     |                                                | Florencio Varela <input type="checkbox"/> |  |
|                                                                                     |                                                                                                                                    | Fundación Infant - Versión 2.1 - Octubre 2016               |                                                | Lomas de Zamora <input type="checkbox"/>  |  |
| 6.                                                                                  | ¿Vive con la mamá del niño/a?                                                                                                      | <input type="checkbox"/> Si                                 | <input type="checkbox"/> No                    |                                           |  |
|                                                                                     |                                                                                                                                    | <input type="checkbox"/> Omite                              | <input type="checkbox"/> Ns/Nc                 |                                           |  |
| <b>(Si contesta Si pasar a " Antecedentes Respiratorios Paternos" )</b>             |                                                                                                                                    |                                                             |                                                |                                           |  |
| 7.                                                                                  | ¿Donde vive el padre?                                                                                                              | Barrio: <input type="text"/>                                |                                                |                                           |  |
|                                                                                     |                                                                                                                                    | <input type="checkbox"/> Omite                              | <input type="checkbox"/> Ns/Nc                 |                                           |  |
| 8.                                                                                  | ¿Hace cuánto vive allí? (Escribir el tiempo correcto)                                                                              | Cantidad de <input type="text"/> <input type="text"/> Meses | <input type="text"/> <input type="text"/> Años |                                           |  |
|                                                                                     |                                                                                                                                    | <input type="checkbox"/> Omite                              | <input type="checkbox"/> Ns/Nc                 |                                           |  |
| 9.                                                                                  | ¿Tiene costumbre de cambiar de casa?                                                                                               | <input type="checkbox"/> Si →                               | Motivo <input type="text"/>                    |                                           |  |
|                                                                                     |                                                                                                                                    | <input type="checkbox"/> No                                 |                                                |                                           |  |
|                                                                                     |                                                                                                                                    | <input type="checkbox"/> Omite                              | <input type="checkbox"/> Ns/Nc                 |                                           |  |
| <b>ANTECEDENTES RESPIRATORIOS PATERNOS</b> <span style="float: right;">II</span>    |                                                                                                                                    |                                                             |                                                |                                           |  |
| 1.                                                                                  | ¿Le ha diagnosticado asma o broncoespasmo un médico?                                                                               | <input type="checkbox"/> Si                                 | <input type="checkbox"/> No                    |                                           |  |
|                                                                                     |                                                                                                                                    | <input type="checkbox"/> Omite                              | <input type="checkbox"/> Ns/Nc                 |                                           |  |
| 2.                                                                                  | ¿Presenta rinitis alérgica u otra manifestación de alergia (en la piel, alergia a alimentos)?                                      | <input type="checkbox"/> Si                                 | <input type="checkbox"/> No                    |                                           |  |
|                                                                                     |                                                                                                                                    | <input type="checkbox"/> Omite                              | <input type="checkbox"/> Ns/Nc                 |                                           |  |
| <b>ANTECEDENTES HERMANOS</b> <span style="float: right;">E</span>                   |                                                                                                                                    |                                                             |                                                |                                           |  |
| <b>ANTECEDENTES DE HERMANOS</b> <span style="float: right;">I</span>                |                                                                                                                                    |                                                             |                                                |                                           |  |
| 1.                                                                                  | El niño fallecido, tiene hermanos de diferente madre y/o padre                                                                     | <input type="checkbox"/> Si                                 | <input type="checkbox"/> No                    |                                           |  |
|                                                                                     |                                                                                                                                    | <input type="checkbox"/> Omite                              | <input type="checkbox"/> Ns/Nc                 |                                           |  |
| <b>ANTECEDENTES RESPIRATORIOS DE HERMANOS</b> <span style="float: right;">II</span> |                                                                                                                                    |                                                             |                                                |                                           |  |
| 1.                                                                                  | ¿Un médico le ha diagnosticado a los hermanos asma o broncoespasmo?                                                                | <input type="checkbox"/> Si                                 | <input type="checkbox"/> No                    |                                           |  |
|                                                                                     |                                                                                                                                    | <input type="checkbox"/> Omite                              | <input type="checkbox"/> Ns/Nc                 |                                           |  |
| 2.                                                                                  | ¿Presentan los hermanos rinitis alérgica u otra manifestación de alergia (en la piel, alergia a alimentos)?                        | <input type="checkbox"/> Si                                 | <input type="checkbox"/> No                    |                                           |  |
|                                                                                     |                                                                                                                                    | <input type="checkbox"/> Omite                              | <input type="checkbox"/> Ns/Nc                 |                                           |  |
| <b>REDES Y COMUNIDAD</b> <span style="float: right;">F</span>                       |                                                                                                                                    |                                                             |                                                |                                           |  |
| <b>CONVIVIENTES</b> <span style="float: right;">I</span>                            |                                                                                                                                    |                                                             |                                                |                                           |  |
| 1.                                                                                  | ¿Cuántas personas conviven juntas en la misma casa que el niño/a fallecida? Especificar número excluyendo a el niño/a fallecido/a? | <input type="text"/> <input type="text"/> personas          | <input type="checkbox"/> Omite                 | <input type="checkbox"/> Ns/Nc            |  |

Identificación del Paciente: \_\_\_\_ - \_\_\_\_ - \_\_\_\_ - \_\_\_\_ - \_\_\_\_

Codificación: dos letras nombre, dos letras apellido y fecha de nacimiento

| FICHA                                                                                                            |                                                                                                                                          | MORTALIDAD INFANTIL DOMICILIARIA<br>Fundación Infant - Versión 2.1 - Octubre 2016                                                                                             |                                                                                                                                                                                                              | Florencio Varela <input type="checkbox"/><br>Lomas de Zamora <input type="checkbox"/> |  |
|------------------------------------------------------------------------------------------------------------------|------------------------------------------------------------------------------------------------------------------------------------------|-------------------------------------------------------------------------------------------------------------------------------------------------------------------------------|--------------------------------------------------------------------------------------------------------------------------------------------------------------------------------------------------------------|---------------------------------------------------------------------------------------|--|
| 2.                                                                                                               | ¿Quiénes componen el grupo de personas convivientes?<br>(Parentescos en relación al niño/a)<br><br>Marcar todas las opciones posibles    | <input type="checkbox"/> Madre<br><input type="checkbox"/> Padre<br><input type="checkbox"/> Tío/a<br><input type="checkbox"/> Hermano/a<br><input type="checkbox"/> Abuelo/a | <input type="checkbox"/> No familiar<br><input type="checkbox"/> Otro menor de 12 años<br><input type="checkbox"/> Otro mayor de 12 años<br><input type="checkbox"/> Omite<br><input type="checkbox"/> Ns/Nc |                                                                                       |  |
| 3.                                                                                                               | Quiénes conforman la red social primaria de convivientes                                                                                 | <input type="checkbox"/> Madre<br><input type="checkbox"/> Padre                                                                                                              | <input type="checkbox"/> Pareja de la Madre<br><input type="checkbox"/> Pareja del Padre                                                                                                                     |                                                                                       |  |
| 4.                                                                                                               | Personas con las cuales la madre/cuidador comparte preocupaciones sobre la salud de los niños.<br><br>Marcar todas las opciones posibles | <input type="checkbox"/> Madre<br><input type="checkbox"/> Padre<br><input type="checkbox"/> Tío/a<br><input type="checkbox"/> Hermano/a<br><input type="checkbox"/> Abuelo/a | <input type="checkbox"/> No familiar<br><input type="checkbox"/> Otro menor de 12 años<br><input type="checkbox"/> Otro mayor de 12 años<br><input type="checkbox"/> Omite<br><input type="checkbox"/> Ns/Nc |                                                                                       |  |
| 5.                                                                                                               | ¿Alguna otra persona participó / colaboró en la crianza de el/la niño/a?                                                                 | <input type="checkbox"/> Si<br><input type="checkbox"/> Omite                                                                                                                 | <input type="checkbox"/> No<br><input type="checkbox"/> Ns/Nc                                                                                                                                                |                                                                                       |  |
| 6.                                                                                                               | Detallar que persona participó / colaboró en la crianza de el/la niño/a.<br><br>Marcar todas las opciones posibles                       | <input type="checkbox"/> Madre<br><input type="checkbox"/> Padre<br><input type="checkbox"/> Tío/a<br><input type="checkbox"/> Hermano/a<br><input type="checkbox"/> Abuelo/a | <input type="checkbox"/> No familiar<br><input type="checkbox"/> Otro menor de 12 años<br><input type="checkbox"/> Otro mayor de 12 años<br><input type="checkbox"/> Omite<br><input type="checkbox"/> Ns/Nc |                                                                                       |  |
| 7.                                                                                                               | ¿Hay convivientes que hayan estado con alguna enfermedad en la última semana previa al fallecimiento de el/la niño/a?                    | <input type="checkbox"/> Si<br><input type="checkbox"/> Omite                                                                                                                 | <input type="checkbox"/> No<br><input type="checkbox"/> Ns/Nc                                                                                                                                                |                                                                                       |  |
| <b>(Si no tuvieron enfermedades, Omite, Ns/Nc pasar a pregunta 9)</b>                                            |                                                                                                                                          |                                                                                                                                                                               |                                                                                                                                                                                                              |                                                                                       |  |
| 8.                                                                                                               | ¿Cuál fue/fueron esa/s enfermedad/es?, Especificar:                                                                                      | <input type="text"/><br><input type="checkbox"/> Omite <input type="checkbox"/> Ns/Nc                                                                                         |                                                                                                                                                                                                              |                                                                                       |  |
| 9.                                                                                                               | ¿Hubo alguna situación estresante o evento grave en las últimas semanas, antes de fallecer, que haya afectado a uno o más convivientes?  | <input type="checkbox"/> Si<br><input type="checkbox"/> Omite                                                                                                                 | <input type="checkbox"/> No<br><input type="checkbox"/> Ns/Nc                                                                                                                                                |                                                                                       |  |
| <b>(Si no presentaron situaciones estresantes pasar a ítem "Fuentes de ingresos económicos en convivientes")</b> |                                                                                                                                          |                                                                                                                                                                               |                                                                                                                                                                                                              |                                                                                       |  |
| 10.                                                                                                              | ¿Cuál fue/fueron esa/s situación/es?, Especificar:                                                                                       | <input type="text"/><br><input type="checkbox"/> Omite <input type="checkbox"/> Ns/Nc                                                                                         |                                                                                                                                                                                                              |                                                                                       |  |

Identificación del Paciente: \_\_\_\_ - \_\_\_\_ - \_\_\_\_ - \_\_\_\_ - \_\_\_\_

|                                                              |                                                                                                                                 |                                                                                                                                                                                                                                                                                                                                                                                                                                                                    |                  |                          |
|--------------------------------------------------------------|---------------------------------------------------------------------------------------------------------------------------------|--------------------------------------------------------------------------------------------------------------------------------------------------------------------------------------------------------------------------------------------------------------------------------------------------------------------------------------------------------------------------------------------------------------------------------------------------------------------|------------------|--------------------------|
| <b>FICHA</b>                                                 | <b>MORTALIDAD INFANTIL DOMICILIARIA</b>                                                                                         |                                                                                                                                                                                                                                                                                                                                                                                                                                                                    | Florencio Varela | <input type="checkbox"/> |
|                                                              | Fundación Infant - Versión 2.1 - Octubre 2016                                                                                   |                                                                                                                                                                                                                                                                                                                                                                                                                                                                    | Lomas de Zamora  | <input type="checkbox"/> |
| <b>FUENTES DE INGRESOS ECONÓMICOS EN CONVIVIENTES</b>        |                                                                                                                                 |                                                                                                                                                                                                                                                                                                                                                                                                                                                                    |                  | <b>II</b>                |
| 1.                                                           | ¿Cuántos miembros convivientes trabajan?                                                                                        | <input type="checkbox"/> <input type="checkbox"/> personas<br><input type="checkbox"/> Omite <input type="checkbox"/> Ns/Nc                                                                                                                                                                                                                                                                                                                                        |                  |                          |
| 2.                                                           | ¿Que tipo de trabajo realizan?<br>...<br>Marcar todas las opciones                                                              | <input type="checkbox"/> Regularizado<br><input type="checkbox"/> Informal<br><input type="checkbox"/> Otro<br><input type="checkbox"/> Omite <input type="checkbox"/> Ns/Nc                                                                                                                                                                                                                                                                                       |                  |                          |
| 3.                                                           | ¿La madre recibe apoyo económico de otras personas que no sean convivientes?                                                    | <input type="checkbox"/> Si <input type="checkbox"/> No<br><input type="checkbox"/> Omite <input type="checkbox"/> Ns/Nc                                                                                                                                                                                                                                                                                                                                           |                  |                          |
| <b>EDUCACIÓN DE LOS CONVIVIENTES</b>                         |                                                                                                                                 |                                                                                                                                                                                                                                                                                                                                                                                                                                                                    |                  | <b>III</b>               |
| 1.                                                           | ¿Cuál es el máximo nivel educativo alcanzado en el grupo conviviente?                                                           | <input type="checkbox"/> Primaria incompleta<br><input type="checkbox"/> Primaria completa<br><input type="checkbox"/> Secundaria incompleta (En curso)<br><input type="checkbox"/> Secundaria incompleta (Anbandonó)<br><input type="checkbox"/> Secundaria completa<br><input type="checkbox"/> Terciario/Universitario incompleto<br><input type="checkbox"/> Terciario/Universitario completo<br><input type="checkbox"/> Omite <input type="checkbox"/> Ns/Nc |                  |                          |
| <b>HÁBITOS DE LOS CONVIVIENTES</b>                           |                                                                                                                                 |                                                                                                                                                                                                                                                                                                                                                                                                                                                                    |                  | <b>IV</b>                |
| 1.                                                           | ¿Fumaba alguno de los convivientes mientras vivía el/la niño/a?                                                                 | <input type="checkbox"/> Si <input type="checkbox"/> No<br><input type="checkbox"/> Omite <input type="checkbox"/> Ns/Nc                                                                                                                                                                                                                                                                                                                                           |                  |                          |
| 2.                                                           | ¿Consumía alguno de los convivientes otra droga/sustancia mientras el/la niño/a vivía? (droga, alcohol)                         | <input type="checkbox"/> Si <input type="checkbox"/> No<br><input type="checkbox"/> Omite <input type="checkbox"/> Ns/Nc                                                                                                                                                                                                                                                                                                                                           |                  |                          |
| <b>REDES Y COMUNIDAD (EN RELACIÓN A LA MADRE / CUIDADOR)</b> |                                                                                                                                 |                                                                                                                                                                                                                                                                                                                                                                                                                                                                    |                  | <b>V</b>                 |
| 1.                                                           | ¿Existen situaciones de violencia en la red primaria?(vínculos violentos,descuido,maltrato,consumo,conflictos con la ley etc.)? | <input type="checkbox"/> Si <input type="checkbox"/> No<br><input type="checkbox"/> Omite <input type="checkbox"/> Ns/Nc                                                                                                                                                                                                                                                                                                                                           |                  |                          |
| 2.                                                           | ¿Conoce algún grupo comunitario, religioso, de actividades o encuentros barriales, recreativos, culturales, o políticos?        | <input type="checkbox"/> Si <input type="checkbox"/> No<br><input type="checkbox"/> Omite <input type="checkbox"/> Ns/Nc                                                                                                                                                                                                                                                                                                                                           |                  |                          |
| (Si No Conoce, Omite, Ns/Nc pasar a pregunta 5 )             |                                                                                                                                 |                                                                                                                                                                                                                                                                                                                                                                                                                                                                    |                  |                          |

Identificación del Paciente: \_\_\_\_ - \_\_\_\_ - \_\_\_\_ - \_\_\_\_ - \_\_\_\_

| FICHA                                                                        |                                                                                                                                                                                                                                                 | MORTALIDAD INFANTIL DOMICILIARIA<br>Fundación Infant - Versión 2.1 - Octubre 2016 |                                | Florencio Varela <input type="checkbox"/><br>Lomas de Zamora <input type="checkbox"/> |  |
|------------------------------------------------------------------------------|-------------------------------------------------------------------------------------------------------------------------------------------------------------------------------------------------------------------------------------------------|-----------------------------------------------------------------------------------|--------------------------------|---------------------------------------------------------------------------------------|--|
| 3.                                                                           | ¿Qué grupo/s conoce?, Especificar:                                                                                                                                                                                                              | <input type="text"/>                                                              |                                |                                                                                       |  |
| 4.                                                                           | Si participa en alguno de esos grupos, especificar cual/es:                                                                                                                                                                                     | <input type="text"/>                                                              |                                |                                                                                       |  |
|                                                                              |                                                                                                                                                                                                                                                 | <input type="checkbox"/> Omite                                                    | <input type="checkbox"/> Ns/Nc |                                                                                       |  |
| 5.                                                                           | ¿Realiza alguna actividad de recreación?                                                                                                                                                                                                        | <input type="checkbox"/> Si                                                       | <input type="checkbox"/> No    |                                                                                       |  |
|                                                                              |                                                                                                                                                                                                                                                 | <input type="checkbox"/> Omite                                                    | <input type="checkbox"/> Ns/Nc |                                                                                       |  |
| 6.                                                                           | ¿Tiene amigas/os?                                                                                                                                                                                                                               | <input type="checkbox"/> Si                                                       | <input type="checkbox"/> No    |                                                                                       |  |
|                                                                              |                                                                                                                                                                                                                                                 | <input type="checkbox"/> Omite                                                    | <input type="checkbox"/> Ns/Nc |                                                                                       |  |
| 7.                                                                           | Ante un problema afectivo, económico, etc., si necesitas pedir un favor, ¿a quien se lo pedís?                                                                                                                                                  | <input type="text"/>                                                              |                                |                                                                                       |  |
|                                                                              |                                                                                                                                                                                                                                                 | <input type="checkbox"/> Omite                                                    | <input type="checkbox"/> Ns/Nc |                                                                                       |  |
| 8.                                                                           | ¿La madre o alguno de los convivientes recibe apoyo económico del Estado? (Asignación universal, bolsones, pensiones, etc.)                                                                                                                     | <input type="checkbox"/> Si                                                       | <input type="checkbox"/> No    |                                                                                       |  |
|                                                                              |                                                                                                                                                                                                                                                 | <input type="checkbox"/> Omite                                                    | <input type="checkbox"/> Ns/Nc |                                                                                       |  |
| <b>SOCIABILIZACIÓN Y MEDIO AMBIENTE</b> <span style="float: right;">G</span> |                                                                                                                                                                                                                                                 |                                                                                   |                                |                                                                                       |  |
| <b>JARDÍN DE INFANTES O MATERNAL</b> <span style="float: right;">I</span>    |                                                                                                                                                                                                                                                 |                                                                                   |                                |                                                                                       |  |
| 1.                                                                           | ¿Conoce algún jardín de infantes o maternal o salita donde pueda dejar a los niños para su cuidado?                                                                                                                                             | <input type="checkbox"/> Si                                                       | <input type="checkbox"/> No    |                                                                                       |  |
|                                                                              |                                                                                                                                                                                                                                                 | <input type="checkbox"/> Omite                                                    | <input type="checkbox"/> Ns/Nc |                                                                                       |  |
| (Si es NO, Omite, Ns/Nc pasar a ítem " Juegos" )                             |                                                                                                                                                                                                                                                 |                                                                                   |                                |                                                                                       |  |
| 2.                                                                           | ¿Cuáles/es es/son es/esos lugar/es?                                                                                                                                                                                                             | <input type="text"/>                                                              |                                |                                                                                       |  |
| 3                                                                            | ¿A que lugar/es concurría habitualmente?                                                                                                                                                                                                        | Nombre:                                                                           | <input type="text"/>           |                                                                                       |  |
|                                                                              |                                                                                                                                                                                                                                                 | Barrio:                                                                           | <input type="text"/>           |                                                                                       |  |
|                                                                              |                                                                                                                                                                                                                                                 | Otro:                                                                             | <input type="text"/>           |                                                                                       |  |
| <b>JUEGO</b> <span style="float: right;">II</span>                           |                                                                                                                                                                                                                                                 |                                                                                   |                                |                                                                                       |  |
| 1.                                                                           | ¿Jugaba el/la niño/a?                                                                                                                                                                                                                           | <input type="checkbox"/> Si                                                       | <input type="checkbox"/> No    |                                                                                       |  |
|                                                                              |                                                                                                                                                                                                                                                 | <input type="checkbox"/> Omite                                                    | <input type="checkbox"/> Ns/Nc |                                                                                       |  |
| 2.                                                                           | ¿A que jugaba?                                                                                                                                                                                                                                  | <input type="text"/>                                                              |                                |                                                                                       |  |
| <b>CUIDADOS PERSONALES</b> <span style="float: right;">III</span>            |                                                                                                                                                                                                                                                 |                                                                                   |                                |                                                                                       |  |
| 1.                                                                           | Describir los hábitos de cuidado personal que el/la niño/a tenía, siguiendo la siguiente guía: higiene corporal, uso de jabón / shampoo, lavado de manos habitual, cepillado de dientes diario, ropa limpia, utensilios de cocina limpios, etc. | <input type="text"/>                                                              |                                |                                                                                       |  |
|                                                                              |                                                                                                                                                                                                                                                 | <input type="checkbox"/> Omite                                                    | <input type="checkbox"/> Ns/Nc |                                                                                       |  |

Identificación del Paciente: \_\_\_\_ - \_\_\_\_ - \_\_\_\_ - \_\_\_\_ - \_\_\_\_

|                                                                                              |                                                                                   |                                                                                                                                                                                                                                                                                                                                                                                                                                                                                                                                                                                                                                                                                                                                                                                                                                   |                  |                          |
|----------------------------------------------------------------------------------------------|-----------------------------------------------------------------------------------|-----------------------------------------------------------------------------------------------------------------------------------------------------------------------------------------------------------------------------------------------------------------------------------------------------------------------------------------------------------------------------------------------------------------------------------------------------------------------------------------------------------------------------------------------------------------------------------------------------------------------------------------------------------------------------------------------------------------------------------------------------------------------------------------------------------------------------------|------------------|--------------------------|
| FICHA                                                                                        | MORTALIDAD INFANTIL DOMICILIARIA                                                  |                                                                                                                                                                                                                                                                                                                                                                                                                                                                                                                                                                                                                                                                                                                                                                                                                                   | Florencio Varela | <input type="checkbox"/> |
|                                                                                              | Fundación Infant - Versión 2.1 - Octubre 2016                                     |                                                                                                                                                                                                                                                                                                                                                                                                                                                                                                                                                                                                                                                                                                                                                                                                                                   | Lomas de Zamora  | <input type="checkbox"/> |
| AMBIENTE SEGURO - PREVENCIÓN DE ACCIDENTES                                                   |                                                                                   |                                                                                                                                                                                                                                                                                                                                                                                                                                                                                                                                                                                                                                                                                                                                                                                                                                   |                  |                          |
| 1.                                                                                           | Marcar todas las situaciones de riesgo de accidentes que se encuentran en la casa | <input type="checkbox"/> Enchufes sin protección /Art. Eléc. Descuidados<br><input type="checkbox"/> Riesgo de quemaduras por agua caliente / estufas / etc.<br><input type="checkbox"/> Riesgo de ahogamiento / sumersión en baño, tachos, etc.<br><input type="checkbox"/> Riesgo de caída de altura (camas elevadas/ escaleras/ casa en altura/ etc.)<br><input type="checkbox"/> Piedras y vidrios en el piso de la casa y en el exterior<br><input type="checkbox"/> Puerta de acceso a la vivienda sin cerradura<br><input type="checkbox"/> Animales en la casa no adiestrados / no vacunados<br><input type="checkbox"/> Elementos de limpieza / medicamentos u otros tóxicos a la alcance de los niños.<br><input type="checkbox"/> Otro, especificar ↓<br><input type="checkbox"/> Omite <input type="checkbox"/> Ns/Nc |                  |                          |
| VIVIENDA Y SERVICIOS (VIVIENDA DONDE RESIDÍA EL NIÑO/A) <span style="float: right;">H</span> |                                                                                   |                                                                                                                                                                                                                                                                                                                                                                                                                                                                                                                                                                                                                                                                                                                                                                                                                                   |                  |                          |
| VIVIENDA - DATOS OBTENIDOS POR OBSERVACIÓN <span style="float: right;">I</span>              |                                                                                   |                                                                                                                                                                                                                                                                                                                                                                                                                                                                                                                                                                                                                                                                                                                                                                                                                                   |                  |                          |
| 1.                                                                                           | Municipio de la vivienda:                                                         | <input type="text"/>                                                                                                                                                                                                                                                                                                                                                                                                                                                                                                                                                                                                                                                                                                                                                                                                              |                  |                          |
| 2.                                                                                           | Tipo de zona donde vive:                                                          | <input type="checkbox"/> Urbana<br><input type="checkbox"/> Rural<br><input type="checkbox"/> Asentamiento                                                                                                                                                                                                                                                                                                                                                                                                                                                                                                                                                                                                                                                                                                                        |                  |                          |
| 3.                                                                                           | Condiciones mayoritarias de las calles del barrio:                                | <input type="checkbox"/> Tierra<br><input type="checkbox"/> Asfalto<br><input type="checkbox"/> Tosca                                                                                                                                                                                                                                                                                                                                                                                                                                                                                                                                                                                                                                                                                                                             |                  |                          |
| 4.                                                                                           | Zona anegable:                                                                    | <input type="checkbox"/> Si <input type="checkbox"/> No<br><input type="checkbox"/> Omite <input type="checkbox"/> Ns/Nc                                                                                                                                                                                                                                                                                                                                                                                                                                                                                                                                                                                                                                                                                                          |                  |                          |
| 5.                                                                                           | Existencia de sitios contaminantes (basurales, criaderos, curtiembres etc.)       | <input type="checkbox"/> Si <input type="checkbox"/> No<br><input type="checkbox"/> Omite <input type="checkbox"/> Ns/Nc                                                                                                                                                                                                                                                                                                                                                                                                                                                                                                                                                                                                                                                                                                          |                  |                          |
| 6.                                                                                           | Acceso a medios de transporte público, conectividades.                            | <input type="checkbox"/> Fácil acceso<br><input type="checkbox"/> Difícil acceso<br><input type="checkbox"/> Otro                                                                                                                                                                                                                                                                                                                                                                                                                                                                                                                                                                                                                                                                                                                 |                  |                          |
| 7.                                                                                           | Número de habitaciones (excluyendo baño y cocina):                                | <input type="text"/> <input type="text"/> habitaciones<br><input type="checkbox"/> Omite <input type="checkbox"/> Ns/Nc                                                                                                                                                                                                                                                                                                                                                                                                                                                                                                                                                                                                                                                                                                           |                  |                          |

Identificación del Paciente: \_\_\_\_ - \_\_\_\_ - \_\_\_\_ - \_\_\_\_ - \_\_\_\_

| FICHA                                                                             |                                                                                                                                   | MORTALIDAD INFANTIL DOMICILIARIA<br>Fundación Infant - Versión 2.1 - Octubre 2016                                                                          |                                                                                                                                                         | Florencio Varela <input type="checkbox"/><br>Lomas de Zamora <input type="checkbox"/> |  |
|-----------------------------------------------------------------------------------|-----------------------------------------------------------------------------------------------------------------------------------|------------------------------------------------------------------------------------------------------------------------------------------------------------|---------------------------------------------------------------------------------------------------------------------------------------------------------|---------------------------------------------------------------------------------------|--|
| 8.                                                                                | La vivienda del niño/a era ¿independiente o múltiple?:                                                                            | <input type="checkbox"/> Independiente<br><input type="checkbox"/> Omite                                                                                   | <input type="checkbox"/> Múltiple<br><input type="checkbox"/> Ns/Nc                                                                                     |                                                                                       |  |
| 9.                                                                                | Materiales principales de la vivienda:                                                                                            | <input type="checkbox"/> Chapa<br><input type="checkbox"/> Cartón<br><input type="checkbox"/> Cemento                                                      | <input type="checkbox"/> Madera<br><input type="checkbox"/> Adobe<br><input type="checkbox"/> Otros                                                     |                                                                                       |  |
| 10.                                                                               | Techo:                                                                                                                            | <input type="checkbox"/> Chapa<br><input type="checkbox"/> Cartón                                                                                          | <input type="checkbox"/> Losa<br><input type="checkbox"/> Otros                                                                                         |                                                                                       |  |
| 11.                                                                               | Piso:                                                                                                                             | <input type="checkbox"/> Tierra<br><input type="checkbox"/> Cemento / mosaico                                                                              | <input type="checkbox"/> Cemento<br><input type="checkbox"/> Otros                                                                                      |                                                                                       |  |
| 12.                                                                               | Baño: Marcar todas las que correspondan                                                                                           | <input type="checkbox"/> Único familiar<br><input type="checkbox"/> Fuera de la casa<br><input type="checkbox"/> Inodoro<br><input type="checkbox"/> Omite | <input type="checkbox"/> Compartido<br><input type="checkbox"/> Dentro de la casa<br><input type="checkbox"/> Letrina<br><input type="checkbox"/> Ns/Nc |                                                                                       |  |
| SERVICIOS - DATOS OBTENIDOS POR OBSERVACIÓN <span style="float: right;">II</span> |                                                                                                                                   |                                                                                                                                                            |                                                                                                                                                         |                                                                                       |  |
| 1.                                                                                | Agua de consumo:                                                                                                                  | <input type="checkbox"/> Segura<br><input type="checkbox"/> Omite                                                                                          | <input type="checkbox"/> No segura<br><input type="checkbox"/> Ns/Nc                                                                                    |                                                                                       |  |
| 2.                                                                                | Lugar de acceso al agua :                                                                                                         | <input type="checkbox"/> Dentro de la vivienda<br><input type="checkbox"/> Omite                                                                           | <input type="checkbox"/> Fuera de la vivienda<br><input type="checkbox"/> Ns/Nc                                                                         |                                                                                       |  |
| 3.                                                                                | Fuente del agua:                                                                                                                  | <input type="checkbox"/> Corriente<br><input type="checkbox"/> Otro Especificar <input type="text"/>                                                       | <input type="checkbox"/> De pozo<br><input type="checkbox"/> Ns/Nc                                                                                      |                                                                                       |  |
| 4.                                                                                | Modo de calefacción:                                                                                                              | <input type="checkbox"/> Gas natural<br><input type="checkbox"/> Leña<br><input type="checkbox"/> Omite                                                    | <input type="checkbox"/> Garrafa<br><input type="checkbox"/> Eléctrica<br><input type="checkbox"/> Ns/Nc                                                |                                                                                       |  |
| 5.                                                                                | Modo de cocina:                                                                                                                   | <input type="checkbox"/> Gas natural<br><input type="checkbox"/> Leña<br><input type="checkbox"/> Omite                                                    | <input type="checkbox"/> Garrafa<br><input type="checkbox"/> Eléctrica<br><input type="checkbox"/> Ns/Nc                                                |                                                                                       |  |
| 6.                                                                                | Describir elementos de la vivienda, por fuera y por dentro, que le llamen la atención y que no estén especificadas en otra parte: | <div style="border: 1px solid black; height: 60px;"></div>                                                                                                 |                                                                                                                                                         |                                                                                       |  |

Identificación del Paciente: \_\_\_\_ - \_\_\_\_ - \_\_\_\_ - \_\_\_\_ - \_\_\_\_

|                                                                                           |                                                              |                                                                                                                                                                             |                                                                       |                          |
|-------------------------------------------------------------------------------------------|--------------------------------------------------------------|-----------------------------------------------------------------------------------------------------------------------------------------------------------------------------|-----------------------------------------------------------------------|--------------------------|
| <b>FICHA</b>                                                                              | <b>MORTALIDAD INFANTIL DOMICILIARIA</b>                      |                                                                                                                                                                             | Florencio Varela                                                      | <input type="checkbox"/> |
|                                                                                           | Fundación Infant - Versión 2.1 - Octubre 2016                |                                                                                                                                                                             | Lomas de Zamora                                                       | <input type="checkbox"/> |
| <b>REGISTROS MÉDICOS (Libreta sanitaria- Historia Clínica - Resumen Historia Clínica)</b> |                                                              |                                                                                                                                                                             |                                                                       | <b>I</b>                 |
| ( Si No posee registros médicos pasar a " Proceso de Muerte" )                            |                                                              |                                                                                                                                                                             |                                                                       |                          |
| <b>EMBARAZO</b>                                                                           |                                                              |                                                                                                                                                                             |                                                                       |                          |
| 1.                                                                                        | ¿Posee la madre/familia la libreta del control del embarazo? | <input type="checkbox"/> Si<br><input type="checkbox"/> Omite                                                                                                               | <input type="checkbox"/> No<br><input type="checkbox"/> Ns/Nc         |                          |
| 2.                                                                                        | Datos que la libreta del embarazo posee:                     | <input type="checkbox"/> Completa<br><input type="checkbox"/> Omite                                                                                                         | <input type="checkbox"/> Incompleta<br><input type="checkbox"/> Ns/Nc |                          |
| <b>CONTROL DEL NIÑO/A</b>                                                                 |                                                              |                                                                                                                                                                             |                                                                       |                          |
| 1.                                                                                        | ¿Tiene la libreta de control de salud de el/la niño/a?       | <input type="checkbox"/> Si<br><input type="checkbox"/> Omite                                                                                                               | <input type="checkbox"/> No<br><input type="checkbox"/> Ns/Nc         |                          |
| 2.                                                                                        | Datos que la libreta del control de salud posee:             | <input type="checkbox"/> Completa<br><input type="checkbox"/> Omite                                                                                                         | <input type="checkbox"/> Incompleta<br><input type="checkbox"/> Ns/Nc |                          |
| <b>NEONATOLOGÍA</b>                                                                       |                                                              |                                                                                                                                                                             |                                                                       |                          |
| 1.                                                                                        | ¿Existe historia clínica del niño/a en neonatología?         | <input type="checkbox"/> Si<br><input type="checkbox"/> Omite                                                                                                               | <input type="checkbox"/> No<br><input type="checkbox"/> Ns/Nc         |                          |
| 2.                                                                                        | Datos que la historia clínica de neonatología posee:         | <input type="checkbox"/> Completa<br><input type="checkbox"/> Omite                                                                                                         | <input type="checkbox"/> Incompleta<br><input type="checkbox"/> Ns/Nc |                          |
| <b>HISTORIA CLÍNICA HOSPITAL</b>                                                          |                                                              |                                                                                                                                                                             |                                                                       |                          |
| 1.                                                                                        | ¿Existe historia clínica del niño/a en algún hospital?       | <input type="checkbox"/> Si<br><input type="checkbox"/> Omite                                                                                                               | <input type="checkbox"/> No<br><input type="checkbox"/> Ns/Nc         |                          |
| 2.                                                                                        | Datos que la historia clínica del hospital posee:            | <input type="checkbox"/> Completa<br><input type="checkbox"/> Omite                                                                                                         | <input type="checkbox"/> Incompleta<br><input type="checkbox"/> Ns/Nc |                          |
| <b>HISTORIA CLÍNICA CENTRO DE SALUD</b>                                                   |                                                              |                                                                                                                                                                             |                                                                       |                          |
| 1.                                                                                        | ¿Existe historia clínica del niño/a en un centro de salud?   | <input type="checkbox"/> Si<br><input type="checkbox"/> Omite                                                                                                               | <input type="checkbox"/> No<br><input type="checkbox"/> Ns/Nc         |                          |
| 2.                                                                                        | Datos que la historia clínica del centro de salud posee:     | <input type="checkbox"/> Completa<br><input type="checkbox"/> Omite                                                                                                         | <input type="checkbox"/> Incompleta<br><input type="checkbox"/> Ns/Nc |                          |
| <b>PROCESO DEL EVENTO DE MUERTE</b>                                                       |                                                              |                                                                                                                                                                             |                                                                       |                          |
| <b>TIEMPO Y LUGAR DE MUERTE</b>                                                           |                                                              |                                                                                                                                                                             |                                                                       |                          |
| 1.                                                                                        | ¿Cuál es la fecha del fallecimiento del niño/niña ?          | <input type="text"/> <input type="text"/> / <input type="text"/> <input type="text"/> / <input type="text"/> <input type="text"/> <input type="text"/> <input type="text"/> |                                                                       |                          |

Identificación del Paciente: \_\_\_\_ - \_\_\_\_ - \_\_\_\_ - \_\_\_\_ - \_\_\_\_

| FICHA                                                                                                |                                                                                           | MORTALIDAD INFANTIL DOMICILIARIA<br>Fundación Infant - Versión 2.1 - Octubre 2016                                                                                                                                                         |                                                                                                                    | Florencio Varela <input type="checkbox"/><br>Lomas de Zamora <input type="checkbox"/> |  |
|------------------------------------------------------------------------------------------------------|-------------------------------------------------------------------------------------------|-------------------------------------------------------------------------------------------------------------------------------------------------------------------------------------------------------------------------------------------|--------------------------------------------------------------------------------------------------------------------|---------------------------------------------------------------------------------------|--|
| 2.                                                                                                   | ¿Cuánto tiempo duró la enfermedad que le provocó la muerte?                               | <input type="text"/> días<br><input type="checkbox"/> Omite                                                                                                                                                                               | <input type="text"/> meses<br><input type="checkbox"/> Ns/Nc                                                       |                                                                                       |  |
| 3.                                                                                                   | ¿Dónde falleció el niño/niña?                                                             | <input type="checkbox"/> Hospital<br><input type="checkbox"/> Camino al hospital o centro de salud<br><input type="checkbox"/> Hogar<br><input type="checkbox"/> Otro: Especificar <input type="text"/><br><input type="checkbox"/> Omite | <input type="checkbox"/> Centro de salud<br><input type="checkbox"/> Ns/Nc                                         |                                                                                       |  |
| <b>AUTOPSIA</b> <span style="float: right;">II</span>                                                |                                                                                           |                                                                                                                                                                                                                                           |                                                                                                                    |                                                                                       |  |
| 1.                                                                                                   | ¿Tiene autopsia realizada?                                                                | <input type="checkbox"/> Si<br><input type="checkbox"/> Omite                                                                                                                                                                             | <input type="checkbox"/> No<br><input type="checkbox"/> Ns/Nc                                                      |                                                                                       |  |
| <b>SISTEMA DE SALUD Y ACCESIBILIDAD EN RELACION AL EVENTO</b> <span style="float: right;">III</span> |                                                                                           |                                                                                                                                                                                                                                           |                                                                                                                    |                                                                                       |  |
| 1.                                                                                                   | ¿Concurrió a algún lugar de salud durante la enfermedad que tuvo el/la niño/a ?           | <input type="checkbox"/> Si<br><input type="checkbox"/> Omite                                                                                                                                                                             | <input type="checkbox"/> No<br><input type="checkbox"/> Ns/Nc                                                      |                                                                                       |  |
| (Si Responde NO, Ns/Nc u Omite pasar a pregunta 11)                                                  |                                                                                           |                                                                                                                                                                                                                                           |                                                                                                                    |                                                                                       |  |
| 2.                                                                                                   | ¿A qué lugar de salud o servicio concurrió?                                               | <input type="checkbox"/> Hospital público<br><input type="checkbox"/> Hospital privado<br><input type="checkbox"/> En la casa<br><input type="checkbox"/> Otro: Especificar <input type="text"/><br><input type="checkbox"/> Omite        | <input type="checkbox"/> Centro de salud<br><input type="checkbox"/> Obra social<br><input type="checkbox"/> Ns/Nc |                                                                                       |  |
| 3.                                                                                                   | ¿Fue atendido por el mismo médico/personal del equipo de salud que lo veía habitualmente? | <input type="checkbox"/> Si<br><input type="checkbox"/> Omite                                                                                                                                                                             | <input type="checkbox"/> No<br><input type="checkbox"/> Ns/Nc                                                      |                                                                                       |  |
| 4.                                                                                                   | ¿Cuánto tiempo de viaje tuvo hasta el lugar donde fue asistido?                           | <input type="text"/> minutos<br><input type="checkbox"/> Omite                                                                                                                                                                            | <input type="text"/> horas<br><input type="checkbox"/> Ns/Nc                                                       |                                                                                       |  |
| 5.                                                                                                   | ¿La atendieron con turno?                                                                 | <input type="checkbox"/> Si<br><input type="checkbox"/> Omite                                                                                                                                                                             | <input type="checkbox"/> No<br><input type="checkbox"/> Ns/Nc                                                      |                                                                                       |  |
| 6.                                                                                                   | ¿Cuándo pidió el turno, accedió fácilmente?                                               | <input type="checkbox"/> Si<br><input type="checkbox"/> Omite                                                                                                                                                                             | <input type="checkbox"/> No<br><input type="checkbox"/> Ns/Nc                                                      |                                                                                       |  |
| 7.                                                                                                   | Entre que llegó y el niño/niña fue atendido, ¿cuánto tiempo pasó?                         | <input type="checkbox"/> Poco tiempo<br><input type="checkbox"/> Omite                                                                                                                                                                    | <input type="checkbox"/> Mucho tiempo<br><input type="checkbox"/> Ns/Nc                                            |                                                                                       |  |
| 8.                                                                                                   | ¿Le pidieron que realice algún estudio médico?                                            | <input type="checkbox"/> Si<br><input type="checkbox"/> Omite                                                                                                                                                                             | <input type="checkbox"/> No<br><input type="checkbox"/> Ns/Nc                                                      |                                                                                       |  |
| (Si es NO, Omite, Ns/Nc pasar a " Representacion Grafica del proceso de Muerte")                     |                                                                                           |                                                                                                                                                                                                                                           |                                                                                                                    |                                                                                       |  |

Identificación del Paciente: \_\_\_\_ - \_\_\_\_ - \_\_\_\_ - \_\_\_\_ - \_\_\_\_

| FICHA                                                                                                                      |                                                                                                                                                                                                                                                                                                                                                                                                                                                                                                                                                                                                                                                                                                                                                                                                                                                                                                                                                                                                                                                                                                                                                                                                                                                                                                                                                                                                                                                                                                                                                                                                                                                                                                                                                                                                                                                                                                                                                                                                                                                                                                                                                                                                                                                                                                                                                                                                                                                                                                                                                                                                                                                                                                                                                                                                                                                                                                                                                                                                                                                                                                                                                                                                                                                                                                                                                                                                                                                                                                                                                                                 | MORTALIDAD INFANTIL DOMICILIARIA                                                                                                                                                                                                                                                                                                                                                                                                                                                                                                                                                                                                                                         |  | Fundación Infant - Versión 2.1 - Octubre 2016 |  | Florencio Varela <input style="width: 30px;" type="text"/><br>Lomas de Zamora <input style="width: 30px;" type="text"/> |  |
|----------------------------------------------------------------------------------------------------------------------------|---------------------------------------------------------------------------------------------------------------------------------------------------------------------------------------------------------------------------------------------------------------------------------------------------------------------------------------------------------------------------------------------------------------------------------------------------------------------------------------------------------------------------------------------------------------------------------------------------------------------------------------------------------------------------------------------------------------------------------------------------------------------------------------------------------------------------------------------------------------------------------------------------------------------------------------------------------------------------------------------------------------------------------------------------------------------------------------------------------------------------------------------------------------------------------------------------------------------------------------------------------------------------------------------------------------------------------------------------------------------------------------------------------------------------------------------------------------------------------------------------------------------------------------------------------------------------------------------------------------------------------------------------------------------------------------------------------------------------------------------------------------------------------------------------------------------------------------------------------------------------------------------------------------------------------------------------------------------------------------------------------------------------------------------------------------------------------------------------------------------------------------------------------------------------------------------------------------------------------------------------------------------------------------------------------------------------------------------------------------------------------------------------------------------------------------------------------------------------------------------------------------------------------------------------------------------------------------------------------------------------------------------------------------------------------------------------------------------------------------------------------------------------------------------------------------------------------------------------------------------------------------------------------------------------------------------------------------------------------------------------------------------------------------------------------------------------------------------------------------------------------------------------------------------------------------------------------------------------------------------------------------------------------------------------------------------------------------------------------------------------------------------------------------------------------------------------------------------------------------------------------------------------------------------------------------------------------|--------------------------------------------------------------------------------------------------------------------------------------------------------------------------------------------------------------------------------------------------------------------------------------------------------------------------------------------------------------------------------------------------------------------------------------------------------------------------------------------------------------------------------------------------------------------------------------------------------------------------------------------------------------------------|--|-----------------------------------------------|--|-------------------------------------------------------------------------------------------------------------------------|--|
| 9.                                                                                                                         | ¿Se hizo los estudios que le pidieron?                                                                                                                                                                                                                                                                                                                                                                                                                                                                                                                                                                                                                                                                                                                                                                                                                                                                                                                                                                                                                                                                                                                                                                                                                                                                                                                                                                                                                                                                                                                                                                                                                                                                                                                                                                                                                                                                                                                                                                                                                                                                                                                                                                                                                                                                                                                                                                                                                                                                                                                                                                                                                                                                                                                                                                                                                                                                                                                                                                                                                                                                                                                                                                                                                                                                                                                                                                                                                                                                                                                                          | <input type="checkbox"/> Si <input type="checkbox"/> No<br><input type="checkbox"/> Omite <input type="checkbox"/> Ns/Nc                                                                                                                                                                                                                                                                                                                                                                                                                                                                                                                                                 |  |                                               |  |                                                                                                                         |  |
| 10.                                                                                                                        | ¿Cuál/es son los estudios que le realizaron al niño/a ? Describir                                                                                                                                                                                                                                                                                                                                                                                                                                                                                                                                                                                                                                                                                                                                                                                                                                                                                                                                                                                                                                                                                                                                                                                                                                                                                                                                                                                                                                                                                                                                                                                                                                                                                                                                                                                                                                                                                                                                                                                                                                                                                                                                                                                                                                                                                                                                                                                                                                                                                                                                                                                                                                                                                                                                                                                                                                                                                                                                                                                                                                                                                                                                                                                                                                                                                                                                                                                                                                                                                                               | <div style="border: 1px solid black; height: 30px; width: 100%;"></div> <input type="checkbox"/> Omite <input type="checkbox"/> Ns/Nc                                                                                                                                                                                                                                                                                                                                                                                                                                                                                                                                    |  |                                               |  |                                                                                                                         |  |
| 11.                                                                                                                        | Si no concurrió a algún centro de salud, ¿Cuál fue la razón por lo que no concurrió?<br><br>Marque todas las opciones posibles                                                                                                                                                                                                                                                                                                                                                                                                                                                                                                                                                                                                                                                                                                                                                                                                                                                                                                                                                                                                                                                                                                                                                                                                                                                                                                                                                                                                                                                                                                                                                                                                                                                                                                                                                                                                                                                                                                                                                                                                                                                                                                                                                                                                                                                                                                                                                                                                                                                                                                                                                                                                                                                                                                                                                                                                                                                                                                                                                                                                                                                                                                                                                                                                                                                                                                                                                                                                                                                  | <input type="checkbox"/> El niño/niña estaba bien, no necesitaba control médico<br><input type="checkbox"/> Obstáculos (temores, expectativas)<br><input type="checkbox"/> No tiene acompañamiento<br><input type="checkbox"/> No tiene con quien dejar a sus hijos<br><input type="checkbox"/> Le queda muy lejos<br><input type="checkbox"/> No tiene transporte desde el domicilio al servicio de salud<br><input type="checkbox"/> No la atienden en el servicio de salud<br><input type="checkbox"/> Inseguridad<br><input type="checkbox"/> No hay turnos <input type="checkbox"/> No hay médicos<br><input type="checkbox"/> Omite <input type="checkbox"/> Ns/Nc |  |                                               |  |                                                                                                                         |  |
| <b>REPRESENTACIÓN GRAFICA DEL PROCESO</b> <span style="float: right; border: 1px solid black; padding: 2px 5px;">IV</span> |                                                                                                                                                                                                                                                                                                                                                                                                                                                                                                                                                                                                                                                                                                                                                                                                                                                                                                                                                                                                                                                                                                                                                                                                                                                                                                                                                                                                                                                                                                                                                                                                                                                                                                                                                                                                                                                                                                                                                                                                                                                                                                                                                                                                                                                                                                                                                                                                                                                                                                                                                                                                                                                                                                                                                                                                                                                                                                                                                                                                                                                                                                                                                                                                                                                                                                                                                                                                                                                                                                                                                                                 |                                                                                                                                                                                                                                                                                                                                                                                                                                                                                                                                                                                                                                                                          |  |                                               |  |                                                                                                                         |  |
| 1.                                                                                                                         | <div style="display: flex; justify-content: space-between;"> <div style="width: 45%;"> <p><b>Lugar del fallecimiento(1)</b> <input style="width: 50px;" type="text"/></p> <p style="text-align: center;">↓</p> <p><b>Destino(2):</b> <input style="width: 50px;" type="text"/></p> <p style="text-align: center;">↓</p> <p><b>Destino(2):</b> <input style="width: 50px;" type="text"/></p> <p style="text-align: center;">↓</p> <p><b>Destino(2):</b> <input style="width: 50px;" type="text"/></p> </div> <div style="width: 50%;"> <div style="border: 1px solid black; padding: 5px; margin-bottom: 5px;">           Hora fallecido: <input style="width: 20px;" type="text"/> : <input style="width: 20px;" type="text"/><br/> <input type="checkbox"/> Auto particular                      <input type="checkbox"/> Transporte publico<br/> <input type="checkbox"/> A pie                      <input type="checkbox"/> Ambulancia<br/> <input type="checkbox"/> Patrullero         </div> <div style="border: 1px solid black; padding: 5px; margin-bottom: 5px;">           Hora de llegada: <input style="width: 20px;" type="text"/> : <input style="width: 20px;" type="text"/><br/> <input type="checkbox"/> A pie                      <input type="checkbox"/> Ambulancia<br/> <input type="checkbox"/> Patrullero<br/> <input type="checkbox"/> Auto particular                      <input type="checkbox"/> Transporte publico         </div> <div style="border: 1px solid black; padding: 5px; margin-bottom: 5px;">           Hora de llegada: <input style="width: 20px;" type="text"/> : <input style="width: 20px;" type="text"/><br/> <input type="checkbox"/> A pie                      <input type="checkbox"/> Ambulancia<br/> <input type="checkbox"/> Patrullero<br/> <input type="checkbox"/> Auto particular                      <input type="checkbox"/> Transporte publico         </div> <div style="border: 1px solid black; padding: 5px;">           Hora de llegada: <input style="width: 20px;" type="text"/> : <input style="width: 20px;" type="text"/> </div> </div> </div> <div style="display: flex; justify-content: space-between; margin-top: 10px;"> <div style="width: 45%;"> <p><u>(1) Lugar del fallecimiento:</u></p> <div style="display: flex; flex-direction: column;"> <div style="border: 1px solid black; padding: 2px; margin-bottom: 2px;">A</div> <div style="border: 1px solid black; padding: 2px; margin-bottom: 2px;">B</div> <div style="border: 1px solid black; padding: 2px; margin-bottom: 2px;">C</div> <div style="border: 1px solid black; padding: 2px; margin-bottom: 2px;">D</div> </div> <p>Hogar<br/>Institución<br/>Medio de transporte<br/>Otro (especificar en el recuadro)</p> </div> <div style="width: 45%;"> <p><u>(2) Destinos:</u></p> <div style="display: flex; flex-direction: column;"> <div style="border: 1px solid black; padding: 2px; margin-bottom: 2px;">1</div> <div style="border: 1px solid black; padding: 2px; margin-bottom: 2px;">2</div> <div style="border: 1px solid black; padding: 2px; margin-bottom: 2px;">3</div> <div style="border: 1px solid black; padding: 2px; margin-bottom: 2px;">4</div> <div style="border: 1px solid black; padding: 2px; margin-bottom: 2px;">5</div> <div style="border: 1px solid black; padding: 2px; margin-bottom: 2px;">6</div> </div> <p>Centro de salud<br/>Otro domicilio particular<br/>Hospital - guardia externa<br/>Hospital - Morgue<br/>Morgue judicial<br/>Otro (especificar en el recuadro)</p> </div> </div> |                                                                                                                                                                                                                                                                                                                                                                                                                                                                                                                                                                                                                                                                          |  |                                               |  |                                                                                                                         |  |

Identificación del Paciente: \_\_\_\_ - \_\_\_\_ - \_\_\_\_ - \_\_\_\_ - \_\_\_\_

|                                                            |                                                                                                                                           |                                                                                                                                                                                                                                                                                                                                                      |                                      |                                           |  |
|------------------------------------------------------------|-------------------------------------------------------------------------------------------------------------------------------------------|------------------------------------------------------------------------------------------------------------------------------------------------------------------------------------------------------------------------------------------------------------------------------------------------------------------------------------------------------|--------------------------------------|-------------------------------------------|--|
| <b>FICHA</b>                                               |                                                                                                                                           | <b>MORTALIDAD INFANTIL DOMICILIARIA</b>                                                                                                                                                                                                                                                                                                              |                                      | Florencio Varela <input type="checkbox"/> |  |
|                                                            |                                                                                                                                           | Fundación Infant - Versión 2.1 - Octubre 2016                                                                                                                                                                                                                                                                                                        |                                      | Lomas de Zamora <input type="checkbox"/>  |  |
| <b>EVENTO DE MUERTE</b>                                    |                                                                                                                                           |                                                                                                                                                                                                                                                                                                                                                      |                                      | <b>K</b>                                  |  |
| <b>ANTECEDENTES NEONATALES PREVIOS AL EVENTO DE MUERTE</b> |                                                                                                                                           |                                                                                                                                                                                                                                                                                                                                                      |                                      | <b>I</b>                                  |  |
| 1.                                                         | ¿Tenía el/la niño/a al nacer algún moretón o marcas de lastimaduras en su cuerpo?                                                         | <input type="checkbox"/> Si                                                                                                                                                                                                                                                                                                                          | <input type="checkbox"/> No          |                                           |  |
|                                                            |                                                                                                                                           | <input type="checkbox"/> Omite                                                                                                                                                                                                                                                                                                                       | <input type="checkbox"/> Ns/Nc       |                                           |  |
| 2.                                                         | Al nacer ¿Tenía el/la niño/a alguna parte diferente o anomalía en su cuerpo? Por ejemplo, alguna parte del cuerpo muy grande o muy chica. | <input type="checkbox"/> Si                                                                                                                                                                                                                                                                                                                          | <input type="checkbox"/> No          |                                           |  |
|                                                            |                                                                                                                                           | <input type="checkbox"/> Omite                                                                                                                                                                                                                                                                                                                       | <input type="checkbox"/> Ns/Nc       |                                           |  |
| 3.                                                         | ¿Donde tenía esas anomalías al momento de su nacimiento?                                                                                  | <input type="checkbox"/> La cabeza era muy chiquita<br><input type="checkbox"/> La cabeza era muy grande<br><input type="checkbox"/> Tenía un tumor o una masa en la parte de atrás de la cabeza o en la columna<br><input type="checkbox"/> Otro: Especificar <input type="text"/><br><input type="checkbox"/> Omite <input type="checkbox"/> Ns/Nc |                                      |                                           |  |
| 4.                                                         | ¿Respiró el/la niño/a inmediatamente después de nacer?                                                                                    | <input type="checkbox"/> Si                                                                                                                                                                                                                                                                                                                          | <input type="checkbox"/> No          |                                           |  |
|                                                            |                                                                                                                                           | <input type="checkbox"/> Omite                                                                                                                                                                                                                                                                                                                       | <input type="checkbox"/> Ns/Nc       |                                           |  |
| 5.                                                         | ¿Tuvo el/la niño/a al nacer dificultades para respirar?                                                                                   | <input type="checkbox"/> Si                                                                                                                                                                                                                                                                                                                          | <input type="checkbox"/> No          |                                           |  |
|                                                            |                                                                                                                                           | <input type="checkbox"/> Omite                                                                                                                                                                                                                                                                                                                       | <input type="checkbox"/> Ns/Nc       |                                           |  |
| 6.                                                         | ¿Se hizo algo en el momento que nació para ayudarlo/a que pueda respirar?                                                                 | <input type="checkbox"/> Si                                                                                                                                                                                                                                                                                                                          | <input type="checkbox"/> No          |                                           |  |
|                                                            |                                                                                                                                           | <input type="checkbox"/> Omite                                                                                                                                                                                                                                                                                                                       | <input type="checkbox"/> Ns/Nc       |                                           |  |
| 7.                                                         | ¿Lloró el/la niño/a inmediatamente después de nacer?                                                                                      | <input type="checkbox"/> Si                                                                                                                                                                                                                                                                                                                          | <input type="checkbox"/> No          |                                           |  |
|                                                            |                                                                                                                                           | <input type="checkbox"/> Omite                                                                                                                                                                                                                                                                                                                       | <input type="checkbox"/> Ns/Nc       |                                           |  |
| 8.                                                         | ¿Cuánto tiempo tardó el/la niño/a en llorar después de nacer?<br>Marcar una sola opción.                                                  | <input type="checkbox"/> En los primeros 5 minutos de nacer<br><input type="checkbox"/> En los primeros 6-30 minutos de nacer<br><input type="checkbox"/> Nunca<br><input type="checkbox"/> Omite <input type="checkbox"/> Ns/Nc                                                                                                                     |                                      |                                           |  |
| 9.                                                         | ¿En algún momento después del parto, dejó de ser capaz de llorar?                                                                         | <input type="checkbox"/> Si                                                                                                                                                                                                                                                                                                                          | <input type="checkbox"/> No          |                                           |  |
|                                                            |                                                                                                                                           | <input type="checkbox"/> Omite                                                                                                                                                                                                                                                                                                                       | <input type="checkbox"/> Ns/Nc       |                                           |  |
| 10.                                                        | ¿Cuánto tiempo antes de fallecer el/la niño/a dejó de llorar?                                                                             | <input type="checkbox"/> Menos de 1 día                                                                                                                                                                                                                                                                                                              | <input type="checkbox"/> 1 día o más |                                           |  |
|                                                            |                                                                                                                                           | <input type="checkbox"/> Omite                                                                                                                                                                                                                                                                                                                       | <input type="checkbox"/> Ns/Nc       |                                           |  |
| 11.                                                        | ¿El/la bebé fue capaz de succionar bien en primer día de vida?                                                                            | <input type="checkbox"/> Si                                                                                                                                                                                                                                                                                                                          | <input type="checkbox"/> No          |                                           |  |
|                                                            |                                                                                                                                           | <input type="checkbox"/> Omite                                                                                                                                                                                                                                                                                                                       | <input type="checkbox"/> Ns/Nc       |                                           |  |

Identificación del Paciente: \_\_\_\_ - \_\_\_\_ - \_\_\_\_ - \_\_\_\_ - \_\_\_\_

| FICHA                                         |                                                                                                               | MORTALIDAD INFANTIL DOMICILIARIA<br>Fundación Infant - Versión 2.1 - Octubre 2016 |                                                                        | Florencio Varela <input type="checkbox"/><br>Lomas de Zamora <input type="checkbox"/> |           |
|-----------------------------------------------|---------------------------------------------------------------------------------------------------------------|-----------------------------------------------------------------------------------|------------------------------------------------------------------------|---------------------------------------------------------------------------------------|-----------|
| 12.                                           | ¿El/la niño/a pudo succionar bien en algún momento?                                                           | <input type="checkbox"/> Si<br><input type="checkbox"/> Omite                     | <input type="checkbox"/> No<br><input type="checkbox"/> Ns/Nc          |                                                                                       |           |
| 13.                                           | ¿Alguna vez dejó de ser capaz de succionar normalmente?                                                       | <input type="checkbox"/> Si<br><input type="checkbox"/> Omite                     | <input type="checkbox"/> No<br><input type="checkbox"/> Ns/Nc          |                                                                                       |           |
| 14.                                           | ¿Cuánto tiempo después de nacer el/la niño/a dejó de ser capaz de succionar?                                  | <input type="checkbox"/> Menos de 1 día<br><input type="checkbox"/> Omite         | <input type="checkbox"/> 1 día o más<br><input type="checkbox"/> Ns/Nc |                                                                                       |           |
| 15.                                           | ¿Alguna vez dejó de ser capaz de succionar normalmente?                                                       | <input type="checkbox"/> Menos de 1 día<br><input type="checkbox"/> Omite         | <input type="checkbox"/> 1 día o más<br><input type="checkbox"/> Ns/Nc |                                                                                       |           |
| 16.                                           | Cuándo dejó de poder succionar normalmente, ¿podía abrir la boca?                                             | <input type="checkbox"/> Si<br><input type="checkbox"/> Omite                     | <input type="checkbox"/> No<br><input type="checkbox"/> Ns/Nc          |                                                                                       |           |
| <b>EVENTO DE MUERTE</b>                       |                                                                                                               |                                                                                   |                                                                        |                                                                                       | <b>II</b> |
| 1.                                            | Durante el tiempo que tuvo la enfermedad que le provocó la muerte ¿tuvo dificultad para respirar normalmente? | <input type="checkbox"/> Si<br><input type="checkbox"/> Omite                     | <input type="checkbox"/> No<br><input type="checkbox"/> Ns/Nc          |                                                                                       |           |
| (Si responde No, Omite, Ns/Nc pasar a Preg 3) |                                                                                                               |                                                                                   |                                                                        |                                                                                       |           |
| 2.                                            | ¿Cuántos días duró la dificultad respiratoria?                                                                | <input type="text"/> días<br><input type="checkbox"/> Omite                       | <input type="checkbox"/> Ns/Nc                                         |                                                                                       |           |
| 3.                                            | Durante el tiempo que tuvo la enfermedad que le provocó la muerte ¿El/la niño/a tuvo tos?                     | <input type="checkbox"/> Si<br><input type="checkbox"/> Omite                     | <input type="checkbox"/> No<br><input type="checkbox"/> Ns/Nc          |                                                                                       |           |
| (Si responde No, Omite, Ns/Nc pasar a Preg 7) |                                                                                                               |                                                                                   |                                                                        |                                                                                       |           |
| 4.                                            | ¿Cuántos días duró la tos?                                                                                    | <input type="text"/> días<br><input type="checkbox"/> Omite                       | <input type="checkbox"/> Ns/Nc                                         |                                                                                       |           |
| 5.                                            | ¿La tos era muy grave, intensa? ¿Cambió de color la cara o boca, se puso morado/a azul?                       | <input type="checkbox"/> Si<br><input type="checkbox"/> Omite                     | <input type="checkbox"/> No<br><input type="checkbox"/> Ns/Nc          |                                                                                       |           |
| 6.                                            | ¿El/la niño/a vomitó después de toser?                                                                        | <input type="checkbox"/> Si<br><input type="checkbox"/> Omite                     | <input type="checkbox"/> No<br><input type="checkbox"/> Ns/Nc          |                                                                                       |           |
| 7.                                            | Durante la enfermedad que le provocó la muerte ¿estuvo respirando más rápido de lo habitual?                  | <input type="checkbox"/> Si<br><input type="checkbox"/> Omite                     | <input type="checkbox"/> No<br><input type="checkbox"/> Ns/Nc          |                                                                                       |           |
| 8.                                            | ¿Cuántos días duró la respiración más rápida?                                                                 | <input type="text"/> días<br><input type="checkbox"/> Omite                       | <input type="checkbox"/> Ns/Nc                                         |                                                                                       |           |
| 9.                                            | Durante el tiempo que tuvo la enfermedad que le provocó la muerte ¿se le hundía el pecho cuando respiraba?    | <input type="checkbox"/> Si<br><input type="checkbox"/> Omite                     | <input type="checkbox"/> No<br><input type="checkbox"/> Ns/Nc          |                                                                                       |           |

Identificación del Paciente: \_\_\_\_ - \_\_\_\_ - \_\_\_\_ - \_\_\_\_ - \_\_\_\_

| FICHA                                          |                                                                                                                                                                          | MORTALIDAD INFANTIL DOMICILIARIA<br>Fundación Infant - Versión 2.1 - Octubre 2016                                                                  |                                                                                     | Florencio Varela <input type="checkbox"/><br>Lomas de Zamora <input type="checkbox"/> |  |
|------------------------------------------------|--------------------------------------------------------------------------------------------------------------------------------------------------------------------------|----------------------------------------------------------------------------------------------------------------------------------------------------|-------------------------------------------------------------------------------------|---------------------------------------------------------------------------------------|--|
| 10.                                            | Durante el tiempo que tuvo la enfermedad que le provocó la muerte<br>¿hacia ruido de quejidos?                                                                           | <input type="checkbox"/> Si<br><input type="checkbox"/> Omite                                                                                      | <input type="checkbox"/> No<br><input type="checkbox"/> Ns/Nc                       |                                                                                       |  |
| 11.                                            | Durante el tiempo que tuvo la enfermedad que le provocó la muerte<br>¿tuvo espasmos o convulsiones?                                                                      | <input type="checkbox"/> Si<br><input type="checkbox"/> Omite                                                                                      | <input type="checkbox"/> No<br><input type="checkbox"/> Ns/Nc                       |                                                                                       |  |
| 12.                                            | Durante el tiempo que tuvo la enfermedad que le provocó la muerte<br>¿El/la niño/a tuvo convulsiones generalizadas o localizadas?                                        | <input type="checkbox"/> Si<br><input type="checkbox"/> Omite                                                                                      | <input type="checkbox"/> No<br><input type="checkbox"/> Ns/Nc                       |                                                                                       |  |
| 13.                                            | ¿Durante el tiempo que tuvo la enfermedad que le provocó la muerte<br>¿Tuvo el/la niño/a rigidez en el cuello?                                                           | <input type="checkbox"/> Si<br><input type="checkbox"/> Omite                                                                                      | <input type="checkbox"/> No<br><input type="checkbox"/> Ns/Nc                       |                                                                                       |  |
| 14.                                            | Durante el tiempo que tuvo la enfermedad que le provocó la muerte<br>¿tuvo la mollerita/fontanela abultada, hinchada?                                                    | <input type="checkbox"/> Si<br><input type="checkbox"/> Omite                                                                                      | <input type="checkbox"/> No<br><input type="checkbox"/> Ns/Nc                       |                                                                                       |  |
| 15.                                            | Durante el tiempo que tuvo la enfermedad que le provocó la muerte<br>¿El/la niño/a tuvo fiebre?                                                                          | <input type="checkbox"/> Si<br><input type="checkbox"/> Omite                                                                                      | <input type="checkbox"/> No<br><input type="checkbox"/> Ns/Nc                       |                                                                                       |  |
| (Si responde No, Omite, Ns/Nc pasar a Preg 18) |                                                                                                                                                                          |                                                                                                                                                    |                                                                                     |                                                                                       |  |
| 16.                                            | ¿Cuántos días duró la fiebre?                                                                                                                                            | <input type="text"/> días<br><input type="checkbox"/> Omite                                                                                        | <input type="checkbox"/> Ns/Nc                                                      |                                                                                       |  |
| 17.                                            | ¿Como fue la gravedad de la fiebre?                                                                                                                                      | <input type="checkbox"/> Leve (<38°C)<br><input type="checkbox"/> Severa (>39°C, o con cambios de color en piel)<br><input type="checkbox"/> Omite | <input type="checkbox"/> Moderada (entre 38-39°C)<br><input type="checkbox"/> Ns/Nc |                                                                                       |  |
| 18.                                            | Durante el tiempo que tuvo la enfermedad que le provocó la muerte<br>¿lo/a notó frío/a cuando lo/a tocaba?                                                               | <input type="checkbox"/> Si<br><input type="checkbox"/> Omite                                                                                      | <input type="checkbox"/> No<br><input type="checkbox"/> Ns/Nc                       |                                                                                       |  |
| (Si responde No, Omite, Ns/Nc pasar a Preg 20) |                                                                                                                                                                          |                                                                                                                                                    |                                                                                     |                                                                                       |  |
| 19.                                            | ¿Cuántos días lo/a sintió frío/a cuando lo/a tocaba?                                                                                                                     | <input type="text"/> días<br><input type="checkbox"/> Omite                                                                                        | <input type="checkbox"/> Ns/Nc                                                      |                                                                                       |  |
| 20.                                            | Durante el tiempo que tuvo la enfermedad que le provocó la muerte<br>¿estuvo dormido, difícil de despertar luego de haber estado conectado/a y despierto/a?              | <input type="checkbox"/> Si<br><input type="checkbox"/> Omite                                                                                      | <input type="checkbox"/> No<br><input type="checkbox"/> Ns/Nc                       |                                                                                       |  |
| 21.                                            | Durante el tiempo que tuvo la enfermedad que le provocó la muerte<br>¿estuvo inconciente, indiferente?                                                                   | <input type="checkbox"/> Si<br><input type="checkbox"/> Omite                                                                                      | <input type="checkbox"/> No<br><input type="checkbox"/> Ns/Nc                       |                                                                                       |  |
| 22.                                            | Durante el tiempo que tuvo la enfermedad que le provocó la muerte<br>¿hacia el/la niño/a más veces caca de lo habitual, o era más líquida y/o la caca fue más abundante? | <input type="checkbox"/> Si<br><input type="checkbox"/> Omite                                                                                      | <input type="checkbox"/> No<br><input type="checkbox"/> Ns/Nc                       |                                                                                       |  |
| (Si responde No, Omite, Ns/Nc pasar a Preg 27) |                                                                                                                                                                          |                                                                                                                                                    |                                                                                     |                                                                                       |  |

Identificación del Paciente: \_\_\_\_ - \_\_\_\_ - \_\_\_\_ - \_\_\_\_ - \_\_\_\_

| FICHA                                                                 |                                                                                                                                         | MORTALIDAD INFANTIL DOMICILIARIA                                                                                                                                                                                                                                                                                                                                                                                                                                                                                         |  | Fundación Infant - Versión 2.1 - Octubre 2016 |  | Florencio Varela <input type="checkbox"/><br>Lomas de Zamora <input type="checkbox"/> |  |
|-----------------------------------------------------------------------|-----------------------------------------------------------------------------------------------------------------------------------------|--------------------------------------------------------------------------------------------------------------------------------------------------------------------------------------------------------------------------------------------------------------------------------------------------------------------------------------------------------------------------------------------------------------------------------------------------------------------------------------------------------------------------|--|-----------------------------------------------|--|---------------------------------------------------------------------------------------|--|
| 23.                                                                   | ¿Cuántas veces hizo caca el/la niño/a el día que hizo más cantidad de lo habitual?                                                      | <input type="text"/> <input type="text"/> veces<br><input type="checkbox"/> Omite <input type="checkbox"/> Ns/Nc                                                                                                                                                                                                                                                                                                                                                                                                         |  |                                               |  |                                                                                       |  |
| 24.                                                                   | ¿Cuántos días antes de fallecer comenzó a hacer más veces caca de lo habitual o las cacas comenzaron a ser mas líquidas de lo habitual? | <input type="text"/> <input type="text"/> días <input type="checkbox"/> Menos de 24 hs<br><input type="checkbox"/> Omite <input type="checkbox"/> Ns/Nc                                                                                                                                                                                                                                                                                                                                                                  |  |                                               |  |                                                                                       |  |
| 25.                                                                   | ¿Las cacas más frecuentes de lo habitual o las cacas más líquidas de lo habitual continuaron hasta el día que el/la niño/a falleció?    | <input type="checkbox"/> Si <input type="checkbox"/> No<br><input type="checkbox"/> Omite <input type="checkbox"/> Ns/Nc                                                                                                                                                                                                                                                                                                                                                                                                 |  |                                               |  |                                                                                       |  |
| 26.                                                                   | ¿Cuántos días antes de fallecer dejó de hacer cacas más líquidas de lo habitual o las cacas dejaron de ser más líquidas?                | <input type="text"/> <input type="text"/> días <input type="checkbox"/> Menos de 24 hs<br><input type="checkbox"/> Omite <input type="checkbox"/> Ns/Nc                                                                                                                                                                                                                                                                                                                                                                  |  |                                               |  |                                                                                       |  |
| 27.                                                                   | ¿En las cacas que hacía se veía sangre?                                                                                                 | <input type="checkbox"/> Si <input type="checkbox"/> No<br><input type="checkbox"/> Omite <input type="checkbox"/> Ns/Nc                                                                                                                                                                                                                                                                                                                                                                                                 |  |                                               |  |                                                                                       |  |
| 28.                                                                   | Durante el tiempo que tuvo la enfermedad que le provocó la muerte ¿el/la niño/a vomitaba todo?                                          | <input type="checkbox"/> Si <input type="checkbox"/> No<br><input type="checkbox"/> Omite <input type="checkbox"/> Ns/Nc                                                                                                                                                                                                                                                                                                                                                                                                 |  |                                               |  |                                                                                       |  |
| 29.                                                                   | Durante el tiempo que tuvo la enfermedad que le provocó la muerte, ¿tuvo erupción - rash en la piel?                                    | <input type="checkbox"/> Si <input type="checkbox"/> No<br><input type="checkbox"/> Omite <input type="checkbox"/> Ns/Nc                                                                                                                                                                                                                                                                                                                                                                                                 |  |                                               |  |                                                                                       |  |
| 30.                                                                   | Durante el tiempo que tuvo la enfermedad que le provocó la muerte, ¿tuvo úlceras, lesiones o lastimaduras en la piel??                  | <input type="checkbox"/> Si <input type="checkbox"/> No<br><input type="checkbox"/> Omite <input type="checkbox"/> Ns/Nc                                                                                                                                                                                                                                                                                                                                                                                                 |  |                                               |  |                                                                                       |  |
| 31.                                                                   | ¿Parecía que el/la niño/a estaba sano/a y luego murió de repente, súbitamente?                                                          | <input type="checkbox"/> Si <input type="checkbox"/> No<br><input type="checkbox"/> Omite <input type="checkbox"/> Ns/Nc                                                                                                                                                                                                                                                                                                                                                                                                 |  |                                               |  |                                                                                       |  |
| 32.                                                                   | ¿Sufrió el/la niño/a alguna de las siguientes heridas o accidentes?<br><br>Marcar todas en las que responda Si.                         | <div> <input type="checkbox"/> Caída <input type="checkbox"/> Accidente de transito<br/> <input type="checkbox"/> Ahogamiento <input type="checkbox"/> Intoxicación<br/> <input type="checkbox"/> Quemadura <input type="checkbox"/> Mordedura de animal<br/> <input type="checkbox"/> Violencia ( suicidio, homicidio, abuso, etc)<br/> <input type="checkbox"/> Otro: Especificar <input type="text"/><br/> <input type="checkbox"/> Omite <input type="checkbox"/> Ns/Nc <input type="checkbox"/> No           </div> |  |                                               |  |                                                                                       |  |
| (Si responde No,Omite, Ns/Nc pasar a "Antecedentes en la comunidad" ) |                                                                                                                                         |                                                                                                                                                                                                                                                                                                                                                                                                                                                                                                                          |  |                                               |  |                                                                                       |  |

Identificación del Paciente: \_\_\_\_ - \_\_\_\_ - \_\_\_\_ - \_\_\_\_ - \_\_\_\_

Codificación: dos letras nombre, dos letras apellido y fecha de nacimiento

| FICHA                                                                    |                                                                                                                                                                | MORTALIDAD INFANTIL DOMICILIARIA<br>Fundación Infant - Versión 2.1 - Octubre 2016                                                                                            |                                                                                                                           | Florencio Varela <input type="checkbox"/><br>Lomas de Zamora <input type="checkbox"/> |  |
|--------------------------------------------------------------------------|----------------------------------------------------------------------------------------------------------------------------------------------------------------|------------------------------------------------------------------------------------------------------------------------------------------------------------------------------|---------------------------------------------------------------------------------------------------------------------------|---------------------------------------------------------------------------------------|--|
| 33.                                                                      | ¿La herida o accidente fueron intencionales, provocadas o Accidentales?                                                                                        | <input type="checkbox"/> Si<br><input type="checkbox"/> Omite                                                                                                                | <input type="checkbox"/> No<br><input type="checkbox"/> Ns/Nc                                                             |                                                                                       |  |
| 34.                                                                      | ¿Cuántas horas sobrevivió después de sufrir la herida o accidente?                                                                                             | <input type="text"/> <input type="text"/> horas<br><input type="checkbox"/> Omite                                                                                            | <input type="text"/> <input type="text"/> días<br><input type="checkbox"/> Ns/Nc                                          |                                                                                       |  |
| <b>ANTECEDENTES EN LA COMUNIDAD</b> <span style="float: right;">L</span> |                                                                                                                                                                |                                                                                                                                                                              |                                                                                                                           |                                                                                       |  |
| <b>FALLECIDOS EN LA COMUNIDAD</b> <span style="float: right;">I</span>   |                                                                                                                                                                |                                                                                                                                                                              |                                                                                                                           |                                                                                       |  |
| 1.                                                                       | ¿Existe algún caso de niño/a fallecido , menor a 14 años en los últimos 12 meses, en la familia, grupo conviviente o vecino cercano del/la niño/a fallecido/a? | <input type="checkbox"/> Si<br><input type="checkbox"/> Omite                                                                                                                | <input type="checkbox"/> No<br><input type="checkbox"/> Ns/Nc                                                             |                                                                                       |  |
| 2.                                                                       | ¿Quién falleció?                                                                                                                                               | <input type="checkbox"/> Conviviente<br><input type="checkbox"/> Vecino<br><input type="checkbox"/> Otro: Especificar <input type="text"/><br><input type="checkbox"/> Omite | <input type="checkbox"/> Primo /Tio<br><input type="checkbox"/> Amigo<br><input type="checkbox"/> Ns/Nc                   |                                                                                       |  |
| 3.                                                                       | ¿Cuándo falleció?                                                                                                                                              | <input type="text"/> <input type="text"/> Mes<br><input type="checkbox"/> Omite                                                                                              | <input type="text"/> <input type="text"/> <input type="text"/> <input type="text"/> Año<br><input type="checkbox"/> Ns/Nc |                                                                                       |  |
| 4.                                                                       | Causa del fallecimiento                                                                                                                                        | <input type="checkbox"/> Accidente<br><input type="checkbox"/> Omite                                                                                                         | <input type="checkbox"/> Enfermedad<br><input type="checkbox"/> Ns/Nc                                                     |                                                                                       |  |
| 5.                                                                       | Lugar del fallecimiento                                                                                                                                        | <input type="checkbox"/> Hogar<br><input type="checkbox"/> Omite                                                                                                             | <input type="checkbox"/> Vía Pública<br><input type="checkbox"/> Ns/Nc                                                    |                                                                                       |  |
| 6.                                                                       | Observaciones                                                                                                                                                  | <input type="text"/>                                                                                                                                                         |                                                                                                                           |                                                                                       |  |
| <b>DATOS DEL FORMULARIO</b> <span style="float: right;">Z</span>         |                                                                                                                                                                |                                                                                                                                                                              |                                                                                                                           |                                                                                       |  |
| <b>ENTREVISTADOR</b> <span style="float: right;">I</span>                |                                                                                                                                                                |                                                                                                                                                                              |                                                                                                                           |                                                                                       |  |
| 1.                                                                       | Nombre y apellido                                                                                                                                              | <input type="text"/>                                                                                                                                                         |                                                                                                                           |                                                                                       |  |
|                                                                          | Firma                                                                                                                                                          | <input type="text"/>                                                                                                                                                         |                                                                                                                           |                                                                                       |  |
|                                                                          | Fecha                                                                                                                                                          | <input type="text"/> <input type="text"/> / <input type="text"/> <input type="text"/> / <input type="text"/> <input type="text"/> <input type="text"/> <input type="text"/>  |                                                                                                                           |                                                                                       |  |

Identificación del Paciente: \_\_\_\_ - \_\_\_\_ - \_\_\_\_ - \_\_\_\_ - \_\_\_\_

| FICHA                  |                   | MORTALIDAD INFANTIL DOMICILIARIA<br>Fundación Infant - Versión 2.1 - Octubre 2016                                                                                           |  | Florencio Varela <input type="checkbox"/><br>Lomas de Zamora <input type="checkbox"/> |     |
|------------------------|-------------------|-----------------------------------------------------------------------------------------------------------------------------------------------------------------------------|--|---------------------------------------------------------------------------------------|-----|
| 2.                     | Nombre y apellido | <input type="text"/>                                                                                                                                                        |  |                                                                                       |     |
|                        | Firma             | <input type="text"/>                                                                                                                                                        |  |                                                                                       |     |
|                        | Fecha             | <input type="text"/> <input type="text"/> / <input type="text"/> <input type="text"/> / <input type="text"/> <input type="text"/> <input type="text"/> <input type="text"/> |  |                                                                                       |     |
| 3.                     | Nombre y apellido | <input type="text"/>                                                                                                                                                        |  |                                                                                       |     |
|                        | Firma             | <input type="text"/>                                                                                                                                                        |  |                                                                                       |     |
|                        | Fecha             | <input type="text"/> <input type="text"/> / <input type="text"/> <input type="text"/> / <input type="text"/> <input type="text"/> <input type="text"/> <input type="text"/> |  |                                                                                       |     |
| REVISIÓN               |                   |                                                                                                                                                                             |  |                                                                                       | II  |
| 1.                     | Nombre y apellido | <input type="text"/>                                                                                                                                                        |  |                                                                                       |     |
|                        | Fecha             | <input type="text"/> <input type="text"/> / <input type="text"/> <input type="text"/> / <input type="text"/> <input type="text"/> <input type="text"/> <input type="text"/> |  |                                                                                       |     |
| 2.                     | Nombre y apellido | <input type="text"/>                                                                                                                                                        |  |                                                                                       |     |
|                        | Fecha             | <input type="text"/> <input type="text"/> / <input type="text"/> <input type="text"/> / <input type="text"/> <input type="text"/> <input type="text"/> <input type="text"/> |  |                                                                                       |     |
| 3.                     | Nombre y apellido | <input type="text"/>                                                                                                                                                        |  |                                                                                       |     |
|                        | Fecha             | <input type="text"/> <input type="text"/> / <input type="text"/> <input type="text"/> / <input type="text"/> <input type="text"/> <input type="text"/> <input type="text"/> |  |                                                                                       |     |
| CARGA EN BASE DE DATOS |                   |                                                                                                                                                                             |  |                                                                                       | III |
| 1.                     | Nombre y apellido | <input type="text"/>                                                                                                                                                        |  |                                                                                       |     |
|                        | Fecha             | <input type="text"/> <input type="text"/> / <input type="text"/> <input type="text"/> / <input type="text"/> <input type="text"/> <input type="text"/> <input type="text"/> |  |                                                                                       |     |
| 2.                     | Nombre y apellido | <input type="text"/>                                                                                                                                                        |  |                                                                                       |     |
|                        | Fecha             | <input type="text"/> <input type="text"/> / <input type="text"/> <input type="text"/> / <input type="text"/> <input type="text"/> <input type="text"/> <input type="text"/> |  |                                                                                       |     |
| 3.                     | Nombre y apellido | <input type="text"/>                                                                                                                                                        |  |                                                                                       |     |
|                        | Fecha             | <input type="text"/> <input type="text"/> / <input type="text"/> <input type="text"/> / <input type="text"/> <input type="text"/> <input type="text"/> <input type="text"/> |  |                                                                                       |     |

Identificación del Paciente: \_\_\_\_ - \_\_\_\_ - \_\_\_\_ - \_\_\_\_ - \_\_\_\_

Codificación: dos letras nombre, dos letras apellido y fecha de nacimiento
